# Supplementary material
Source: publisher figshare collection journal article supplement (https://acs.figshare.com/ndownloader/files/34645970)
Supplement: Supplementary file 1 [file 34645970]

## Supporting Information

### **Amphiphilic Perylene Bisimide-Polymer Conjugates by Cysteine-Based Orthogonal Strategy: Vesicular Aggregation, DNA Binding, and Cell Imaging**

Mahuya Kar<sup>a</sup>, Md. Anas<sup>#a</sup>, Palash Banerjee<sup>#a</sup>, Arpana Singh<sup>b</sup>, Prosenjit Sen<sup>b</sup>, and Tarun K. Mandal<sup>\*a</sup>

<sup>a</sup>*School of Chemical Sciences, Indian Association for the Cultivation of Science, Jadavpur, Kolkata 700032, India*

<sup>b</sup>*School of Biological Sciences, Indian Association for the Cultivation of Science, Jadavpur, Kolkata 700032, India*  
*Email: psutkm@iacs.res.in*

| <b>Contents</b>                                                                               | <b>Page No.</b> |
|-----------------------------------------------------------------------------------------------|-----------------|
| Table S1. Molecular weight characterization and polymerization conditions                     | S3              |
| Figure S1. FTIR spectra of PDA, <b>Cys-PVim-I</b> and <b>PBI-(Cys-PVim-I)<sub>2</sub></b>     | S4              |
| Figure S2. <sup>1</sup> H-NMR spectrum of <b>Cys-PVim-I</b>                                   | S5              |
| Figure S3. MALDI-TOF-MS spectrum of <b>Cys-PVim-I</b>                                         | S6              |
| Figure S4. FTIR spectra of <b>Cys-PVim-II</b> and <b>PBI-(Cys-PVim-II)<sub>2</sub></b>        | S7              |
| Figure S5. <sup>1</sup> H-NMR spectrum of <b>Cys-PVim-II</b>                                  | S8              |
| Molecular weight determination of Cys-PVim from <sup>1</sup> H-NMR spectrum                   | S9              |
| Figure S6. MALDI-TOF-MS spectrum of <b>Cys-PVim-II</b>                                        | S10             |
| Figure S7. <sup>1</sup> H-NMR spectrum of <b>PBI-(Cys-PVim-I)<sub>2</sub></b>                 | S11             |
| Figure S8. <sup>13</sup> C-NMR spectrum of <b>PBI-(Cys-PVim-I)<sub>2</sub></b>                | S12             |
| Figure S9. <sup>1</sup> H-NMR spectrum of <b>PBI-(Cys-PVim-II)<sub>2</sub></b>                | S13             |
| Figure S10. Concentration variation UV-vis spectra of ctDNA                                   | S14             |
| Figure S11. SEC chromatographs of <b>PBI-(Cys-PVim)<sub>2</sub></b> conjugates                | S15             |
| Figure S12. Emission spectra of <b>PBI-(Cys-PVim-II)<sub>2</sub></b> at different excitation. | S16             |
| Figure S13. Images of <b>PBI-(Cys-PVim-II)<sub>2</sub></b> under ambient light and UV lamp    | S17             |
| Table S2. Quantum yield ( $\phi$ ) measurements of <b>PBI-(Cys-PVim)<sub>2</sub></b>          | S18             |
| Figure S14. Concentration-dependent UV-vis spectra of <b>PBI-(Cys-PVim-I)<sub>2</sub></b>     | S19             |
| Figure S15. Concentration-dependent emission spectra of <b>PBI-(Cys-PVim-I)<sub>2</sub></b>   | S20             |

|             |                                                                                                             |     |
|-------------|-------------------------------------------------------------------------------------------------------------|-----|
| Scheme S1.  | Aggregation of PBI-(Cys-PVim) <sub>2</sub> conjugates under acidic medium                                   | S21 |
| Figure S16. | <sup>1</sup> H-NMR spectrum of <b>PBI-(Cys-PVim-II)</b> <sub>2</sub> in D <sub>2</sub> O in presence of HCl | S22 |
| Figure S17. | pH variation images of <b>PBI-(Cys-PVim-II)</b> <sub>2</sub> under ambient and UV light                     | S23 |
| Figure S18. | pH variation UV-Vis and emission spectra of <b>PBI-(Cys-PVim-I)</b> <sub>2</sub>                            | S24 |
| Figure S19. | <i>D<sub>h</sub></i> vs pH plot of the aqueous solution of <b>PBI-(Cys-PVim-II)</b> <sub>2</sub>            | S25 |
| Figure S20. | <i>D<sub>h</sub></i> vs pH plot of the aqueous solution of <b>PBI-(Cys-PVim-I)</b> <sub>2</sub>             | S26 |
| Figure S21. | DLS curves of <b>PBI-(Cys-PVim-I)</b> <sub>2</sub> and <b>PBI-(Cys-PVim-II)</b> <sub>2</sub>                | S27 |
| Figure S22. | CAC measurement plots of <b>PBI-(Cys-PVim-I)</b> <sub>2</sub>                                               | S28 |
| Figure S23. | DLS curves of <b>PBI-(Cys-PVim-II)</b> <sub>2</sub> in water at different time intervals                    | S29 |
| Figure S24. | FESEM image of <b>PBI-(Cys-PVim-II)</b> <sub>2</sub>                                                        | S30 |
| Figure S25. | TEM images of aggregated <b>PBI-(Cys-PVim-I)</b> <sub>2</sub> / <b>PBI-(Cys-PVim-II)</b> <sub>2</sub>       | S31 |
| Figure S26. | Confocal images of aggregated <b>PBI-(Cys-PVim-I)</b> <sub>2</sub> / <b>PBI-(Cys-PVim-II)</b> <sub>2</sub>  | S32 |
| Figure S27. | Time-dependent fluorescence microscopic live cell imaging of HeLa cells                                     | S33 |
| Figure S28. | Mean fluorescence intensity vs time plot of incubated HeLa cells                                            | S34 |
| Figure S29. | pH-dependent fluorescence microscopy live cell imaging of HeLa cells                                        | S35 |
| Figure S30. | Mean fluorescence intensity vs pH plot of incubated HeLa cells                                              | S36 |
| Figure S31. | Zeta potential (ξ) curve of <b>PBI-(Cys-PVim-II)</b> <sub>2</sub> in water                                  | S37 |
| Scheme S2.  | Binding of ctDNA with PBI-(Cys-PVim) <sub>2</sub> conjugate                                                 | S38 |
| Figure S32. | DLS plot of <b>PBI-(Cys-PVim-II)</b> <sub>2</sub> at different concentrations of ctDNA                      | S39 |
| Figure S33. | Gel image of PBI-(Cys-PVim) <sub>2</sub> -ctDNA polyplex                                                    | S40 |
| Figure S34. | Gel image of PBI-(Cys-PVim) <sub>2</sub> -Plasmid DNA polyplex                                              | S41 |
| Figure S35. | ITC measurement plot of ctDNA with <b>PBI-(Cys-PVim-II)</b> <sub>2</sub>                                    | S42 |

**Table S1.** Molecular weight characterization and polymerization conditions of the different Cys-PVims and perylene bisimide-polymer conjugates.

| <b>Polymer</b>                       | <b>[M]<sub>0</sub>/[I]<sub>0</sub></b> | <b><i>M</i><sub>n, theo</sub><br/>(Da)</b> | <b><i>M</i><sub>n, H-NMR</sub><br/>(Da)</b> | <b><i>M</i><sub>n, MALDI</sub><br/>(Da)</b> | <b><i>M</i><sub>n, GPC</sub><br/>(Da)</b> | <b>Dispersity<br/>(<i>D</i>)</b> |
|--------------------------------------|----------------------------------------|--------------------------------------------|---------------------------------------------|---------------------------------------------|-------------------------------------------|----------------------------------|
| <b>Cys-PVim-I</b>                    | 10                                     | 1060                                       | 1400                                        | 1640 <sup>a</sup>                           | 1200 <sup>c</sup>                         | 1.17 <sup>a</sup>                |
| <b>Cys-PVim-II</b>                   | 20                                     | 2000                                       | 2200                                        | 2400 <sup>a</sup>                           | 2500 <sup>c</sup>                         | 1.14 <sup>a</sup>                |
| <b>PBI-(Cys-PVim-I)<sub>2</sub></b>  | -                                      | 2500                                       | 3200 <sup>e</sup>                           | 3600 <sup>d</sup>                           | 2800 <sup>b</sup>                         | 1.64 <sup>b</sup>                |
| <b>PBI-(Cys-PVim-II)<sub>2</sub></b> | -                                      | 4400                                       | 4700 <sup>e</sup>                           | 5100 <sup>d</sup>                           | 5400 <sup>b</sup>                         | 1.67 <sup>b</sup>                |

Condition for polymerization: Solvent = Water; Time =24 h; Temperature = 70 °C.

$$M_{n, \text{theo}} = [\text{Vim}]_0 \times M_{\text{Vim}} / [\text{Cys}]_0 + M_{\text{Cys}}$$

<sup>a</sup>Data obtained from MALDI-TOF-MS analysis.

<sup>b</sup>Data obtained from SEC analysis.

<sup>c</sup>Unable to measured directly from SEC, but they were back calculated from the equation

$$M_n \text{ of Cys-PVim} = [M_{n, \text{GPC}} \text{ of PBI-(PVim)}_2 - M_{\text{PBI}}] / 2.$$

<sup>d</sup>Unable to measured directly from MALDI-TOF-MS, but they were calculated from the equation:  $M_n \text{ of PBI-(Cys-PVim)}_2 = [2 \times M_{n, \text{MALDI}} \text{ of PVim} + M_{\text{PBI}}]$ .

<sup>e</sup>Calculated from the equation:  $M_n \text{ of PBI-(Cys-PVim)}_2 = [2 \times M_{n, \text{HNMR}} \text{ of PVim} + M_{\text{PBI}}]$ .

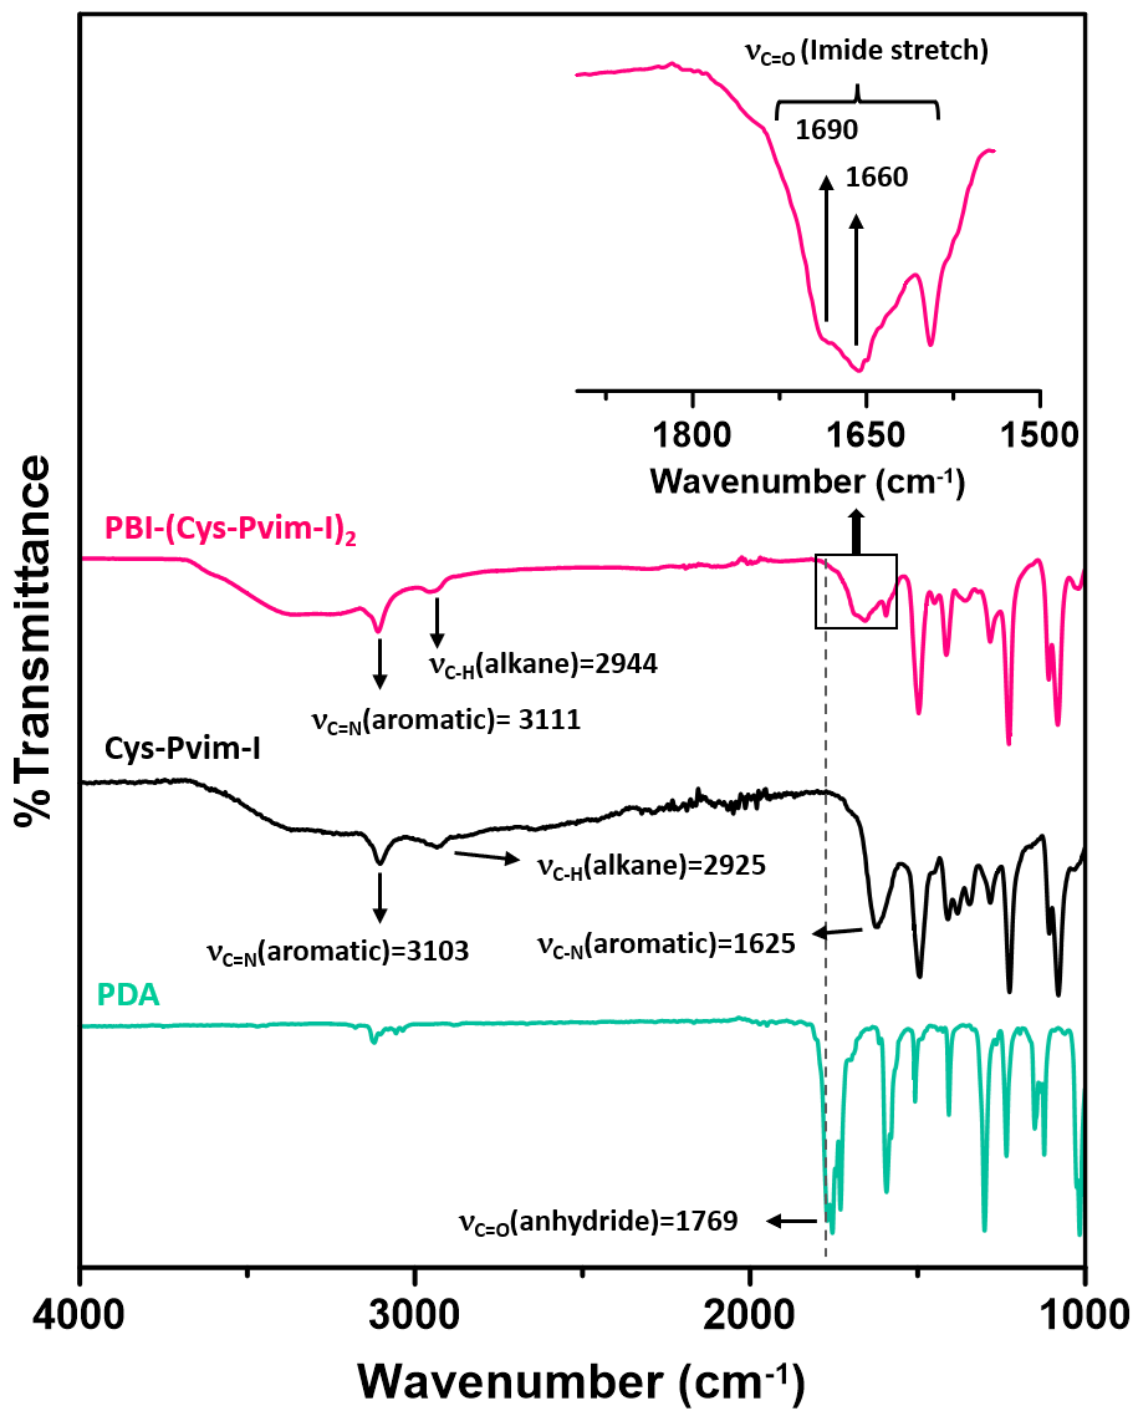

**Figure S1.** FTIR spectra of PDA, Cys-PVim-I, and PBI-(Cys-PVim-I)<sub>2</sub> respectively.

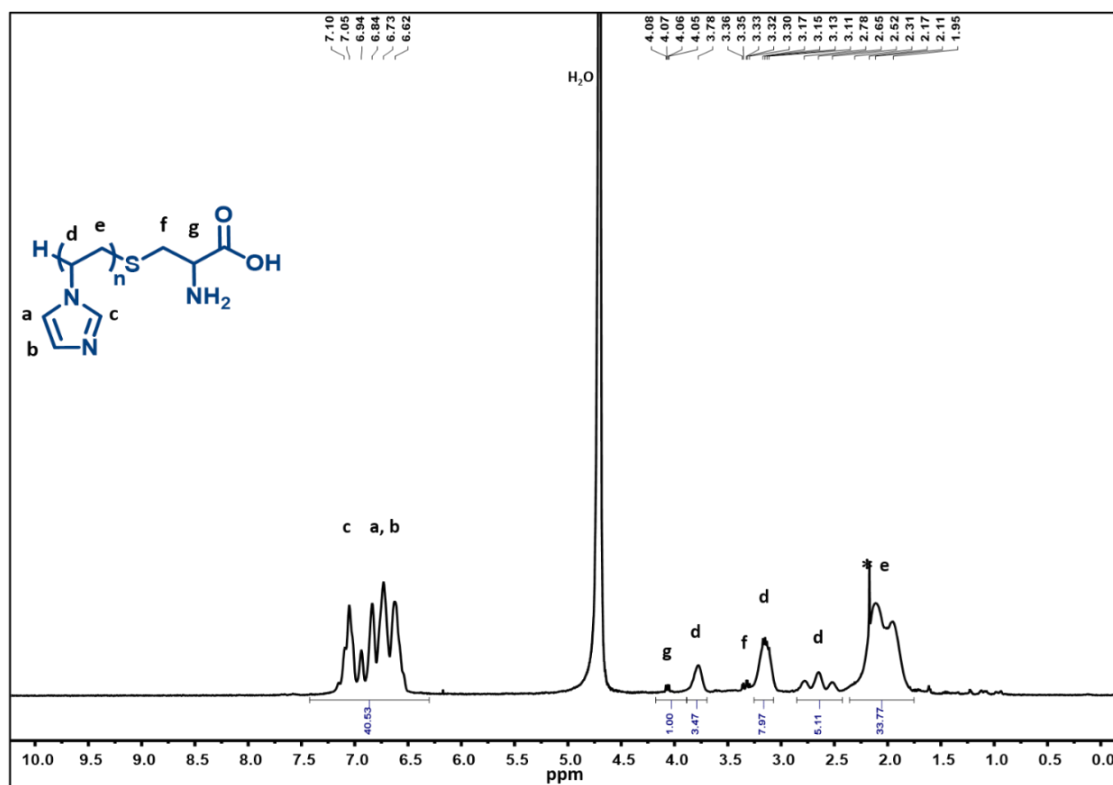

**Figure S2.**  $^1\text{H}$ -NMR spectrum of **Cys-PVim-I** in  $\text{D}_2\text{O}$  (\*acetone).

$^1\text{H}$ -NMR (400 MHz,  $\text{D}_2\text{O}$ , TMS,  $\delta$  ppm), Cys-PVim-I: 1.77-2.30 ( $-\text{CH}_2$  of PVim backbone at position 'e'), 2.45-3.90 ( $-\text{CH}$  of PVim backbone at position 'd'), 3.36 (methylene proton of cysteine residue at position 'f'), 4.06 (methine proton of cysteine residue at position 'g'), 6.47-7.26 (imidazole ring protons at positions 'a', 'b' and 'c').

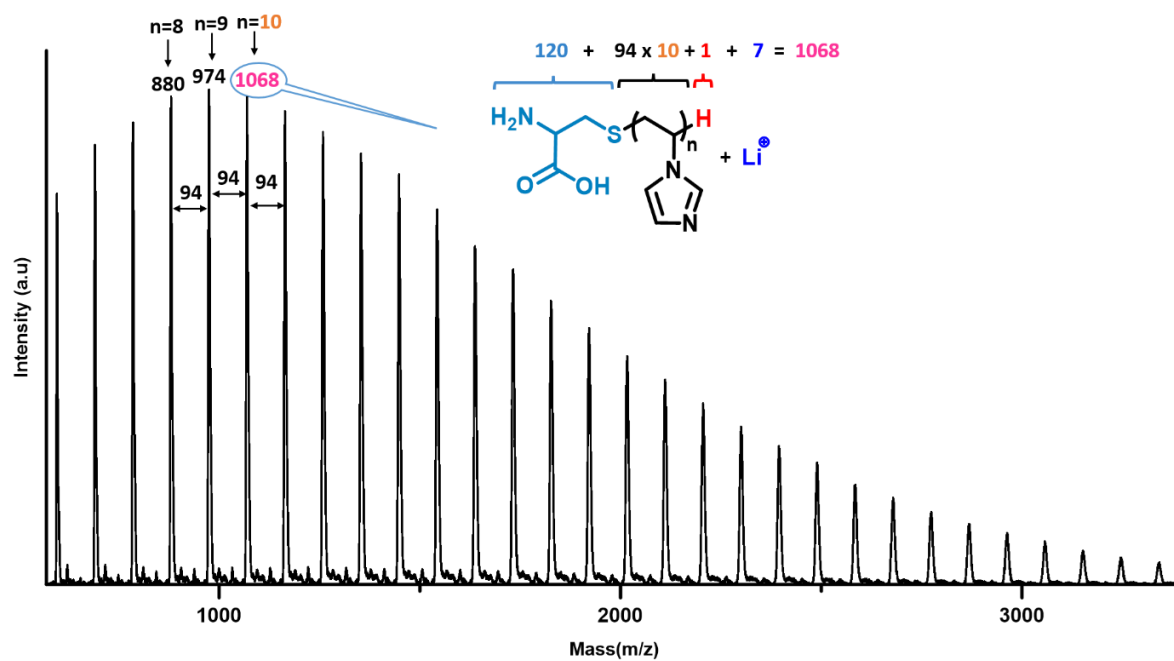

**Figure S3.** MALDI-TOF-MS spectrum of **Cys-PVim-I** in MeOH using DHB matrix and NaI.

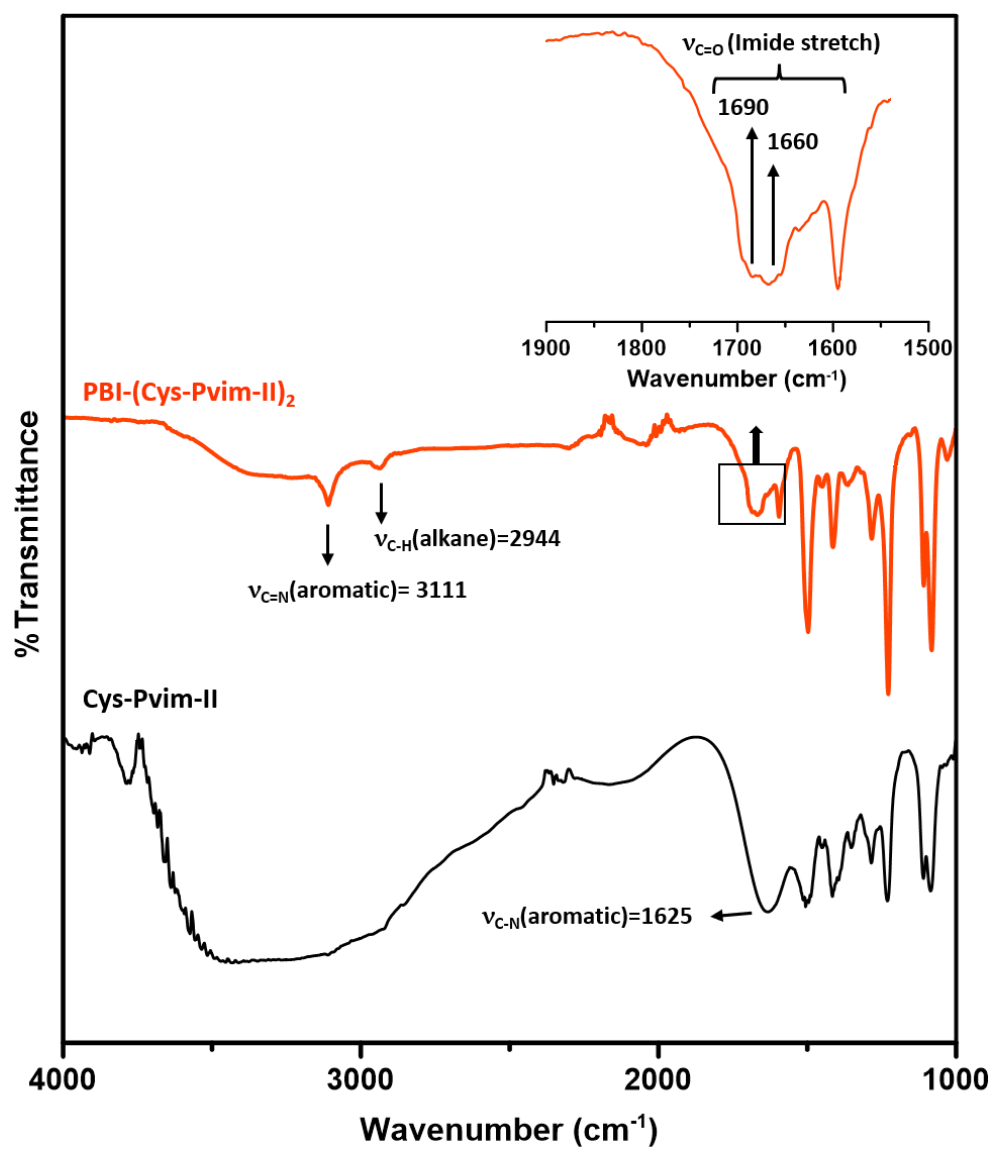

**Figure S4.** FTIR spectra of **Cys-PVim-II** and **PBI-(Cys-PVim-II)<sub>2</sub>** conjugate.

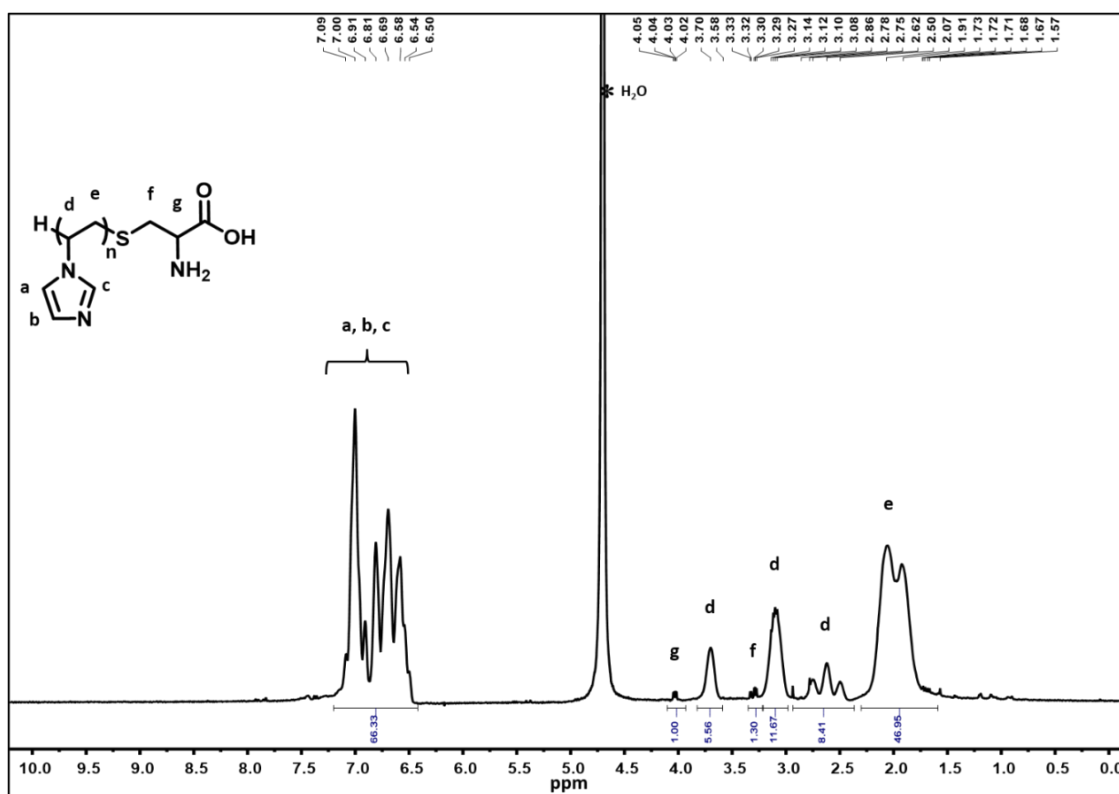

**Figure S5.**  $^1\text{H}$ -NMR spectrum of **Cys-PVim-II** in  $\text{D}_2\text{O}$ .

$^1\text{H}$ -NMR (400 MHz,  $\text{D}_2\text{O}$ , TMS,  $\delta$  ppm), **Cys-PVim-II**: 1.61-2.30 ( $-\text{CH}_2$  of PVim backbone at position 'e'), 2.41-3.81 ( $-\text{CH}$  of PVim backbone at position 'd'), 3.28 (methylene proton of cysteine residue at position 'f'), 4.01 (methine proton of cysteine residue at position 'g'), 6.41-7.19 (imidazole ring protons at positions 'a', 'b' and 'c').



### Molecular weight determination from end group analysis.

Comparing the integration area (see Figure S2) of the 'g' proton at  $\sim \delta$  4.06 ppm and the imidazole protons ('a', 'b' and 'c') at  $\sim \delta$  6.47-7.26 ppm of the  $^1\text{H}$ -NMR spectrum of **Cys-PVim-I** degree of polymerization (DP) was calculated by using the following equation.

DP = Int. of the repeating unit/ $N_o$  of repeating unit  $\times N_o$  of the end group/Int. of the end group

$$= 40.53/3 \times 1/1$$

$$= 13.51 \approx 14$$

Molecular weight ( $M_n$ ) of **Cys-PVim-I** =  $(14 \times 94.05) + 120 + 1 = 1437.7 \approx 1400$  Da

Int. = Integration area,  $N_o$  = Number of protons, Molecular weight of the repeating unit = 94.05, Molecular weight of the Cys residue = 120, Molecular weight of one 'H' atom = 1

Similarly, DP of **Cys-PVim-II** was calculated from the  $^1\text{H}$ -NMR spectrum (see Figure S5) and it was found to be 22.

$$66.33/3 \times 1/1$$

$$= 22.11 \approx 22$$

Molecular weight ( $M_n$ ) of **Cys-PVim-II** =  $(22 \times 94.05) + 120 + 1 = 2190.1 \approx 2200$  Da

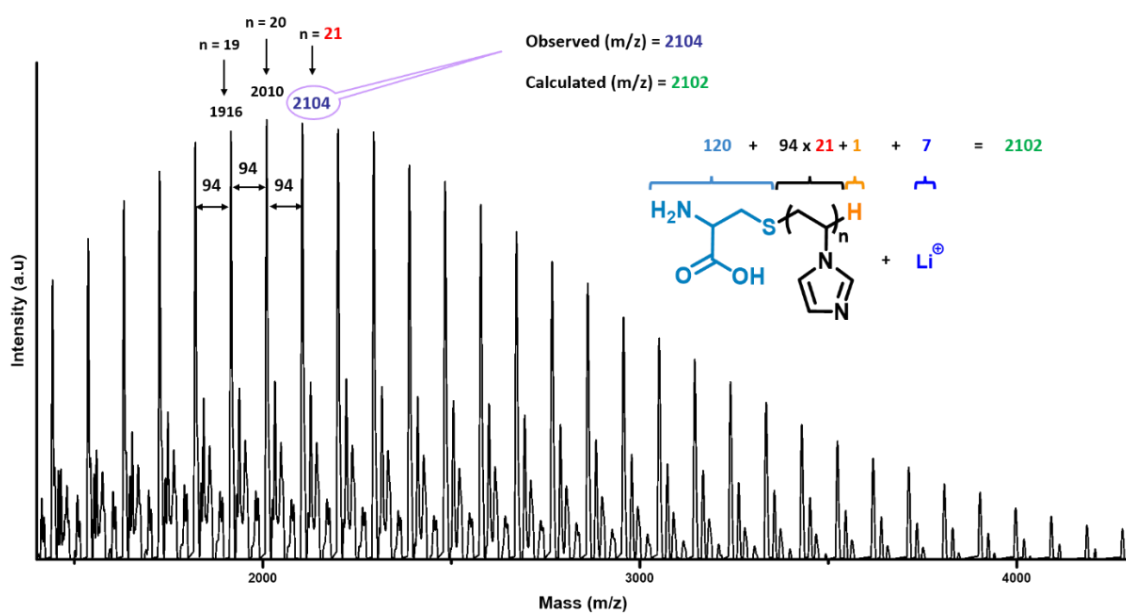

**Figure S6.** MALDI-TOF-MS spectrum of **Cys-PVim-II** in MeOH using DHB matrix and NaI.

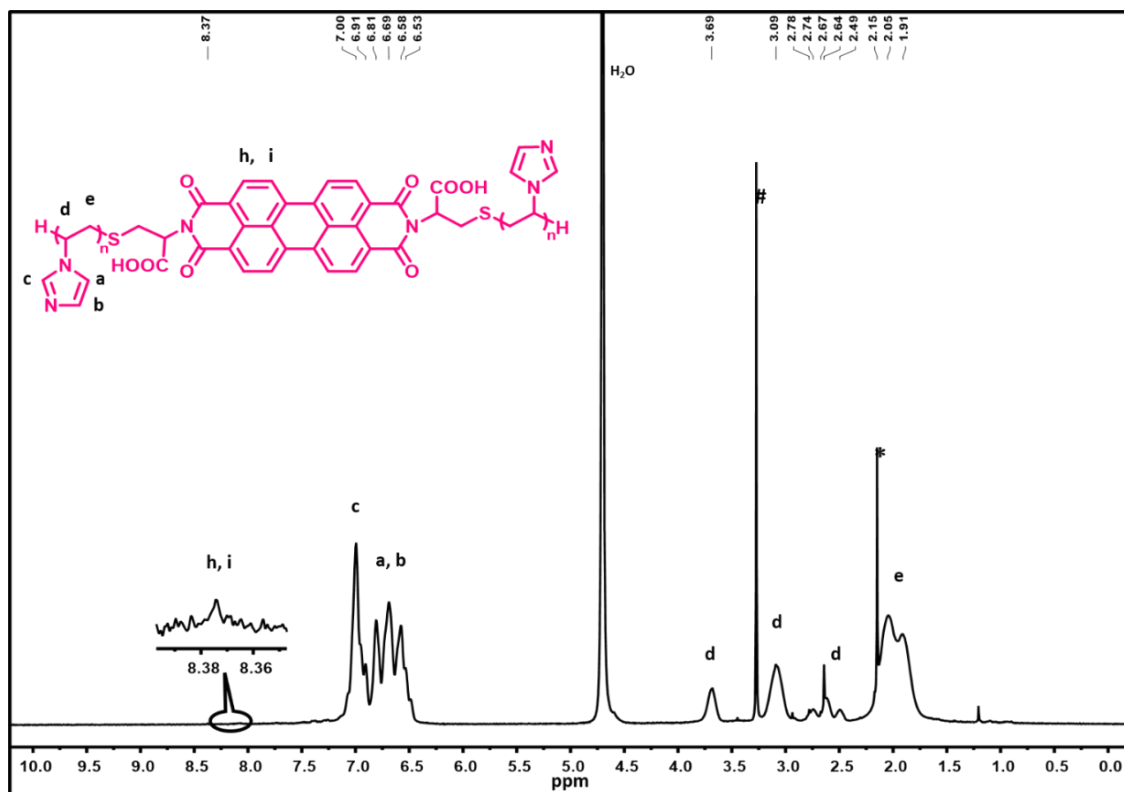

**Figure S7.**  $^1\text{H}$ -NMR spectrum of **PBI-(Cys-PVim-I)<sub>2</sub>** in  $\text{D}_2\text{O}$  (\*for acetone, #solvent impurities).

$^1\text{H}$ -NMR (400 MHz,  $\text{D}_2\text{O}$ , TMS,  $\delta$  ppm), **PBI-(Cys-PVim-I)<sub>2</sub>**: 1.72-2.24 ( $-\text{CH}_2$  of PVim at position 'e'), 2.43-3.80 ( $-\text{CH}$  of PVim at position 'd'), 6.42-7.19 (imidazole ring protons at positions 'a', 'b' and 'c'), 7.97-8.20 (aromatic protons of perylene unit at position 'h', 'i').

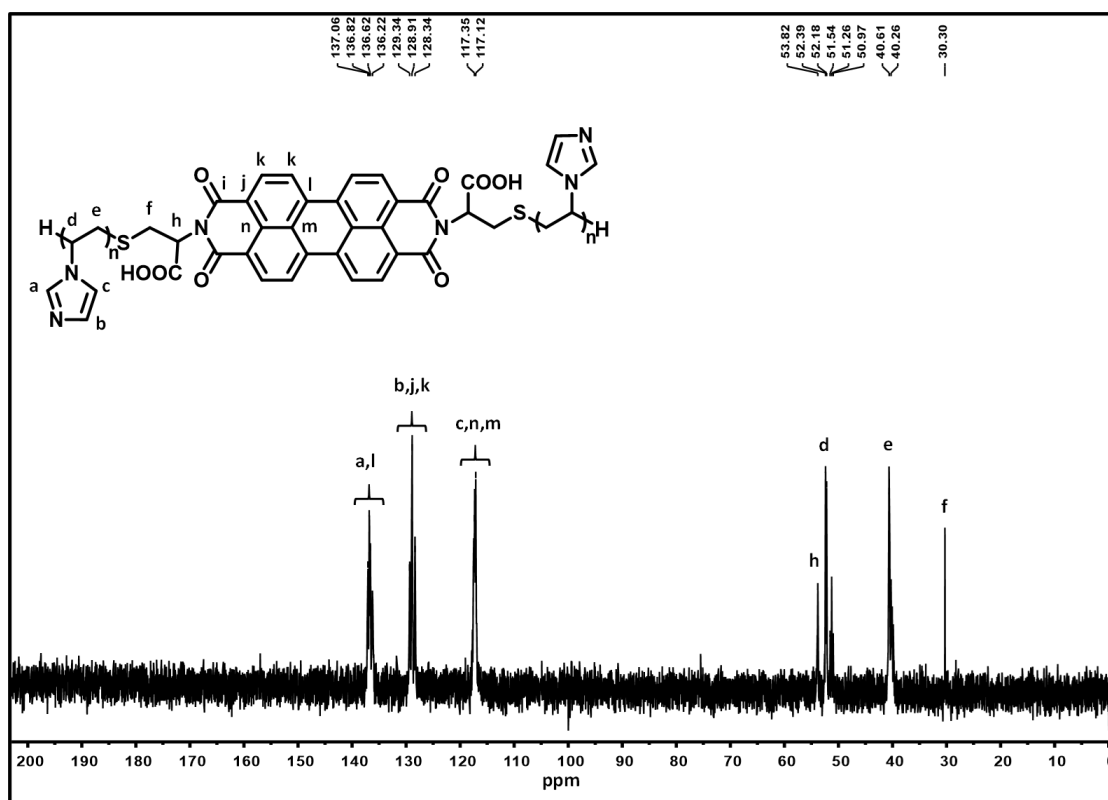

**Figure S8.**  $^{13}\text{C}$ -NMR spectrum of **PBI-(Cys-PVim-I)<sub>2</sub>** in  $\text{D}_2\text{O}$ .

$^{13}\text{C}$ -NMR (100 MHz,  $\text{D}_2\text{O}$ , TMS) ( $\delta$ , ppm), **PBI-(Cys-PVim-I)<sub>2</sub>**: 30.30, 40.26-40.61, 50.97-53.82, 117.12-117.34, 128.34-129.34, 136.22-137.06.

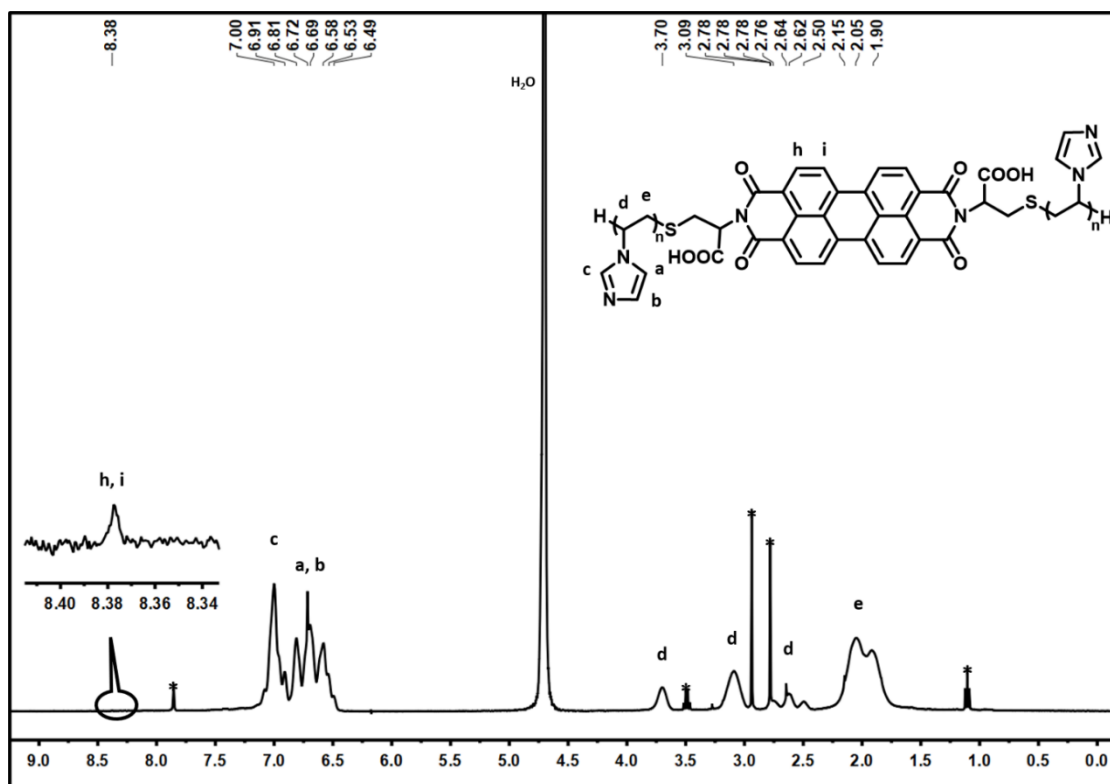

**Figure S9.**  $^1\text{H}$ -NMR spectrum of representative **PBI-(Cys-PVim-II)<sub>2</sub>** in  $\text{D}_2\text{O}$  (\*for DMF).

$^1\text{H}$ -NMR (400 MHz,  $\text{D}_2\text{O}$ , TMS,  $\delta$  ppm), **PBI-(Cys-PVim-II)<sub>2</sub>**: 1.72-2.24 ( $-\text{CH}_2$  of PVim at position 'e'), 2.43-3.80 ( $-\text{CH}$  of PVim at position 'd'), 6.42-7.19 (imidazole ring protons at positions 'a', 'b' and 'c'), 7.97-8.20 (aromatic protons of perylene unit at position 'h', 'i').

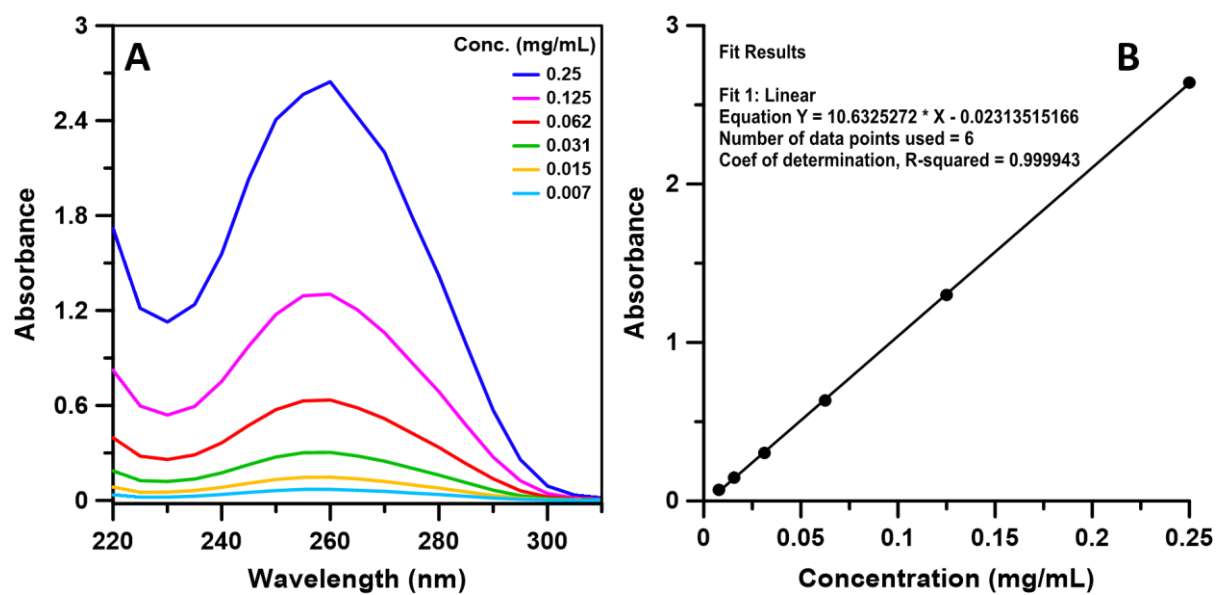

**Figure S10.** Concentration-dependent UV-vis spectra of ctDNA in 10 mM Tris-HCl buffer (A) and absorbance vs concentration calibration plot showing linear fit (B).

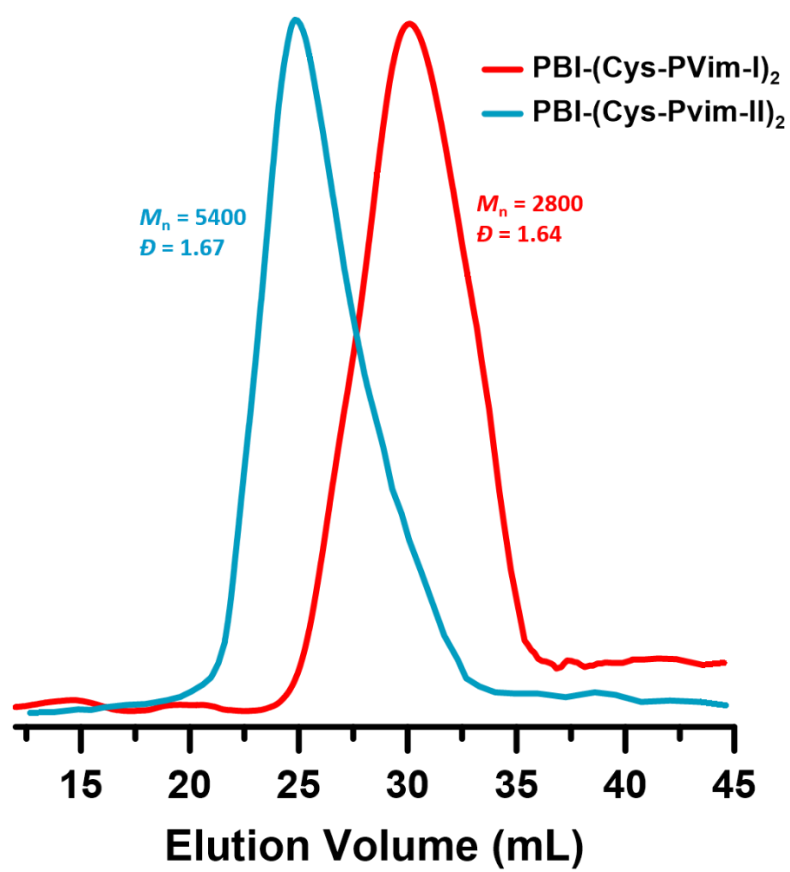

**Figure S11.** SEC chromatograms of the two different PBI-(Cys-PVim)<sub>2</sub> conjugates.

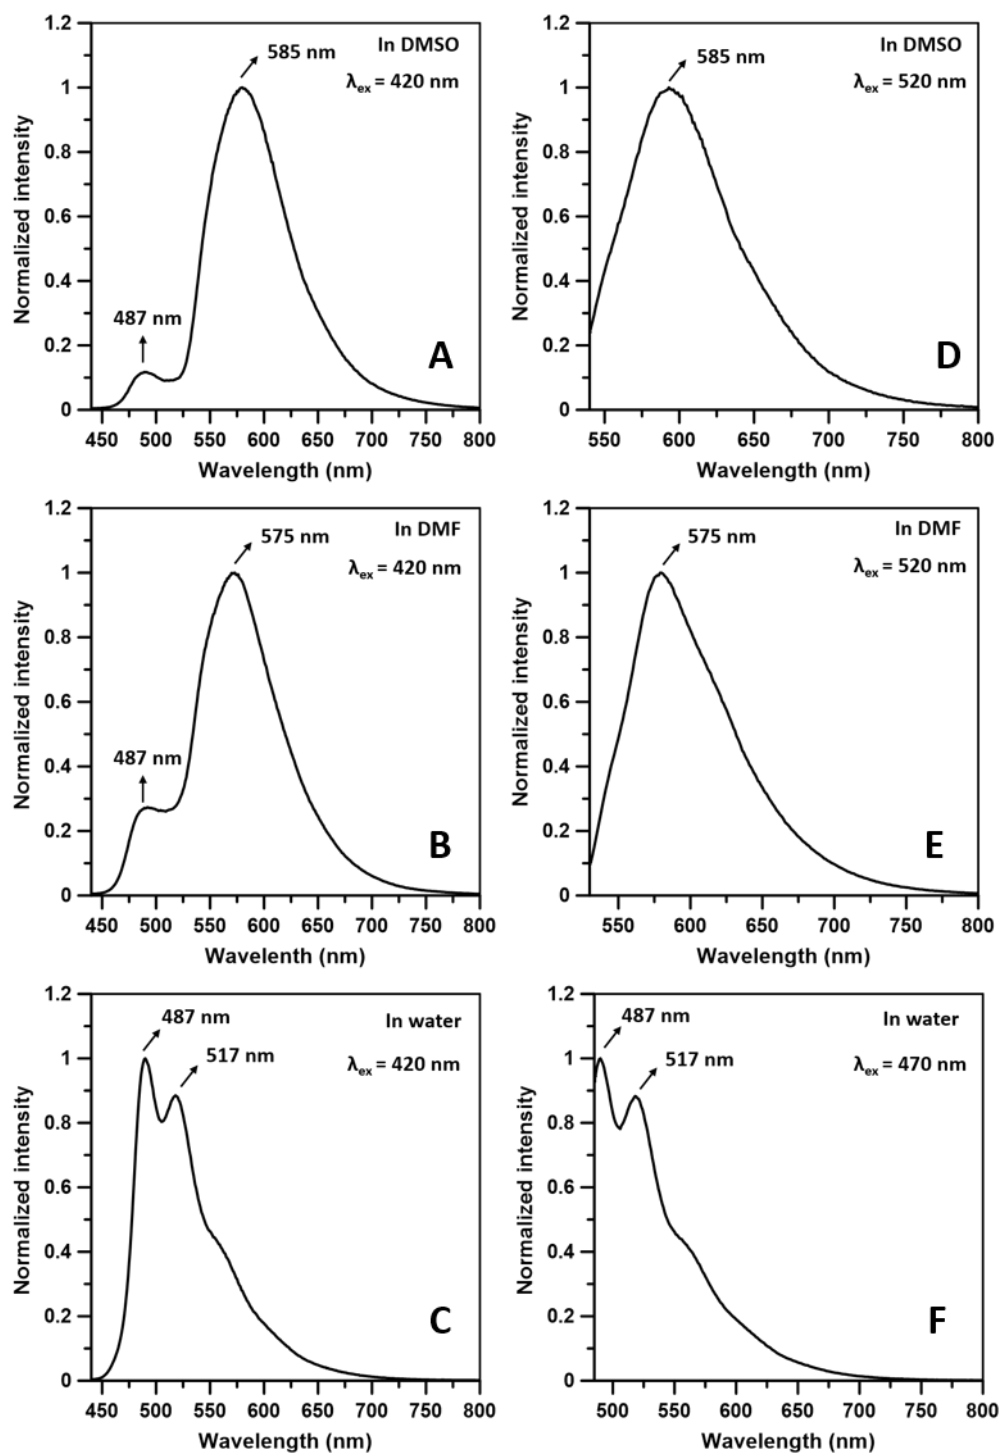

**Figure S12.** Emission spectra of **PBI-(Cys-PVim-II)<sub>2</sub>** in DMSO (A and D), DMF (B and E) using the excitation wavelength of 420 nm and 520 nm and in water (C and F) using the excitation wavelengths of 420 and 470 nm.



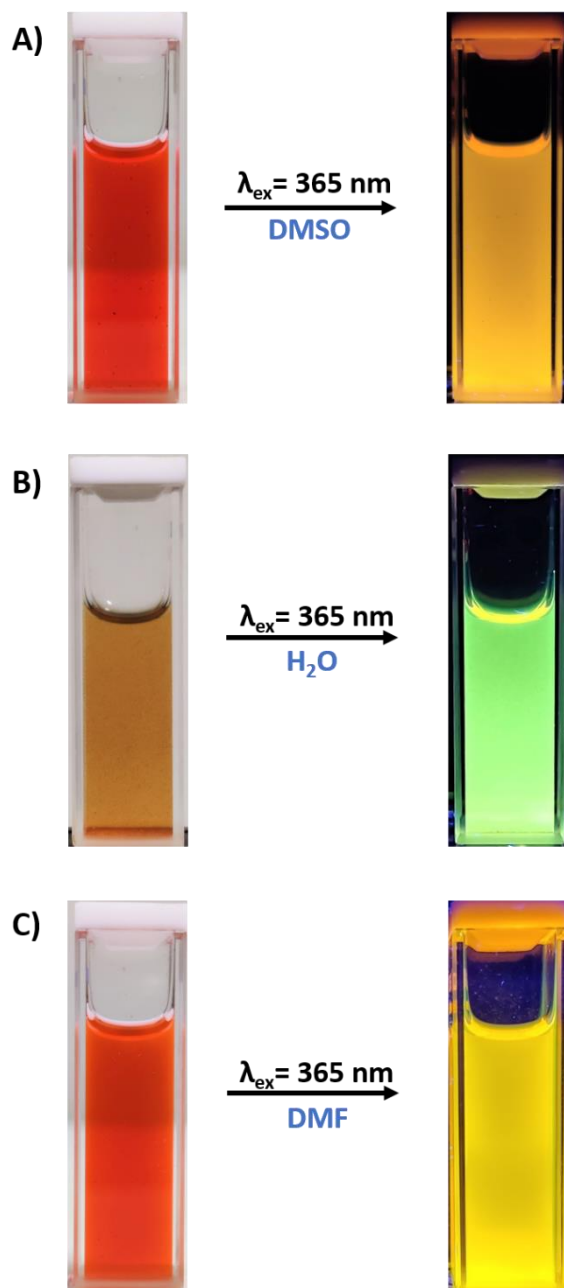

**Figure S13.** Images of solutions of **PBI-(Cys-PVim-II)<sub>2</sub>** (1 mg/mL) in A) DMSO (Top), B) water (middle), and C) DMF (bottom) under ambient and UV light.

### Quantum yield ( $\phi$ ) calculation:

The quantum yield ( $\phi$ ) of two PBI-(Cys-PVim)<sub>2</sub> conjugates were measured in three different solvents such as DMSO, water and DMF using quinine sulfate as a reference standard and using the following equation.

$$\phi_s = \phi_r [(I/A)_s \times (A/I)_r] \times \eta_s^2 / \eta_r^2$$

Where  $I_s$  and  $I_r$  were the integrated emission peak area of the sample and reference,  $A_s$  and  $A_r$  were absorbance of the sample and reference at an excitation wavelength of 370 nm.  $\eta_s$  and  $\eta_r$  are the refractive index of the solvent at which the sample and reference were dissolved.  $\phi_s$  and  $\phi_r$  are the quantum yield of the sample and the reference.

$\phi_r$  of quinine sulfate = 0.53

$\eta_s$  (DMSO) = 1.47 at 20 °C,  $\eta_s$  (DMF) = 1.43 at 20 °C,  $\eta_s$  (water) = 1.33 at 20 °C

**Table S2.** Quantum yields ( $\phi$ ) of **PBI-(Cys-PVim-I)<sub>2</sub>** and **PBI-(Cys-PVim-II)<sub>2</sub>** in DMSO, DMF, and water respectively.

| Conjugate sample                     | $\phi$ in DMSO | $\phi$ in DMF | $\phi$ in water |
|--------------------------------------|----------------|---------------|-----------------|
| <b>PBI-(Cys-PVim-I)<sub>2</sub></b>  | 28.2%          | 38%           | 19%             |
| <b>PBI-(Cys-PVim-II)<sub>2</sub></b> | 19.7%          | 12.8%         | 15%             |

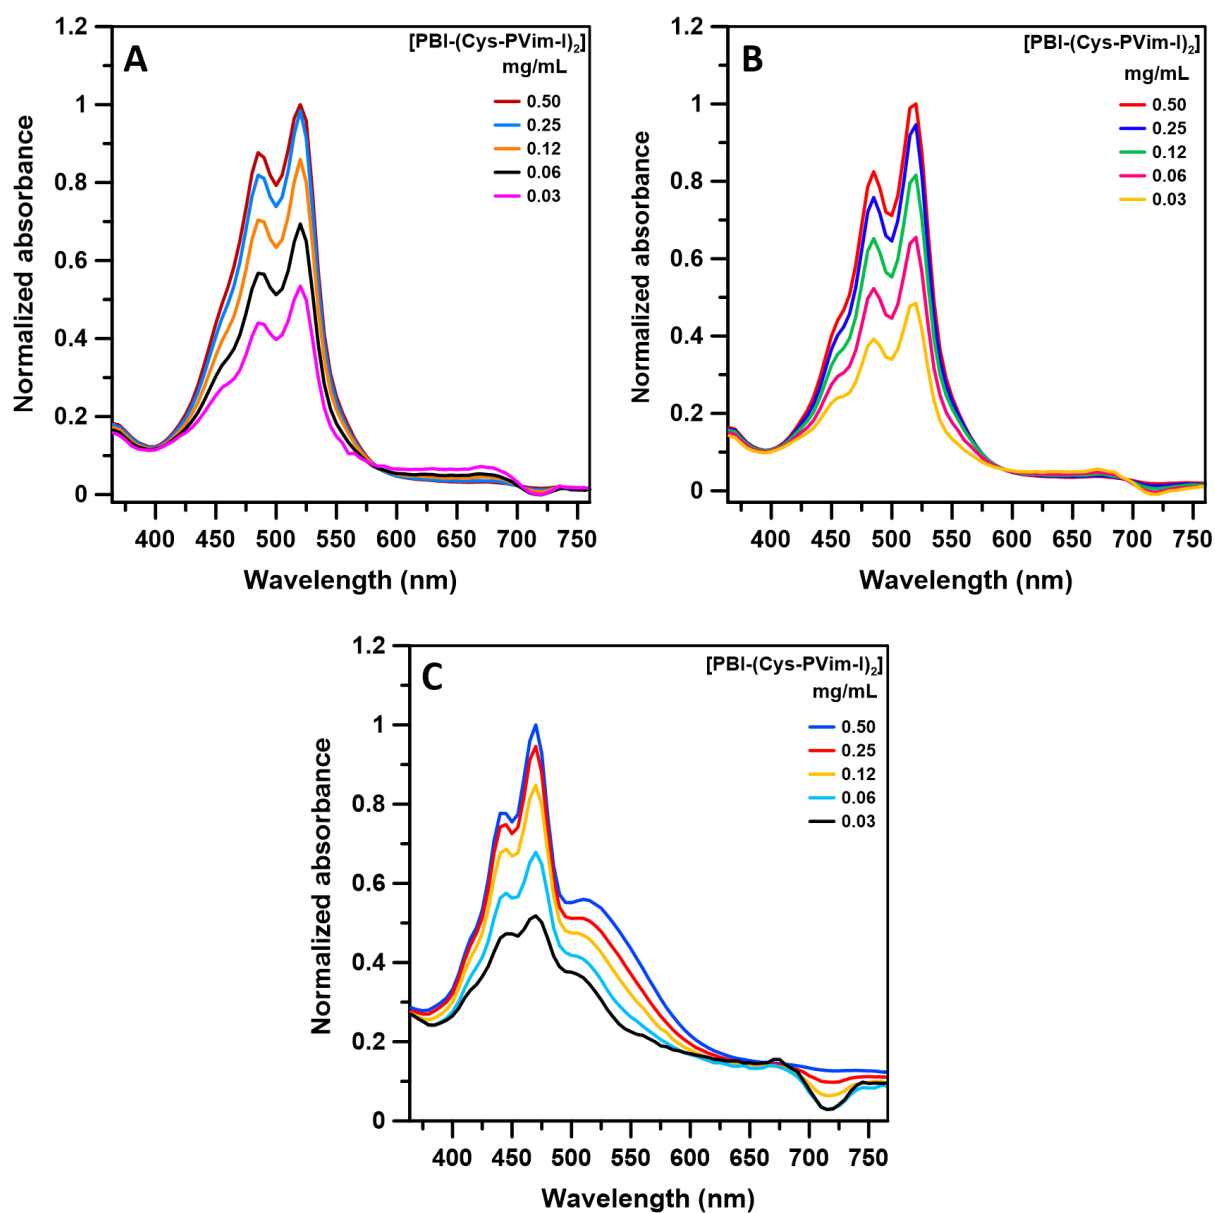

**Figure S14.** Concentration-dependent UV-vis spectra of  $\text{PBI}-(\text{Cys-PVim-I})_2$  conjugate in DMSO (A), DMF (B), and water (C).

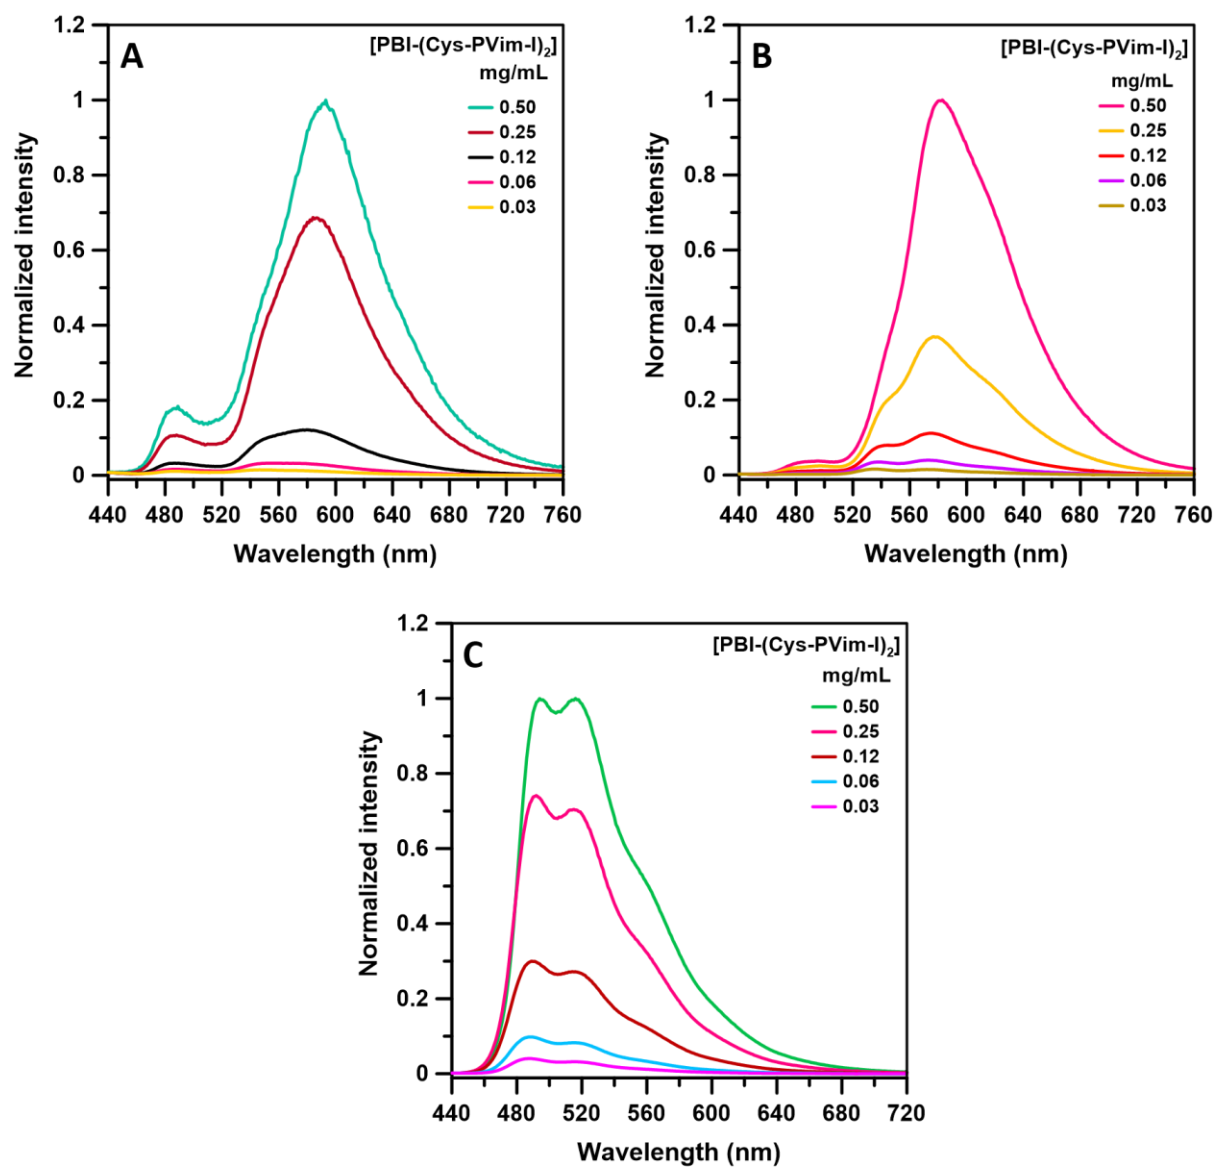

**Figure S15.** Concentration-dependent emission spectra ( $\lambda_{\text{ex}} = 420 \text{ nm}$ ) of  $\text{PBI-(Cys-PVim-I)}_2$  in DMSO (A), DMF (B), and water (C).

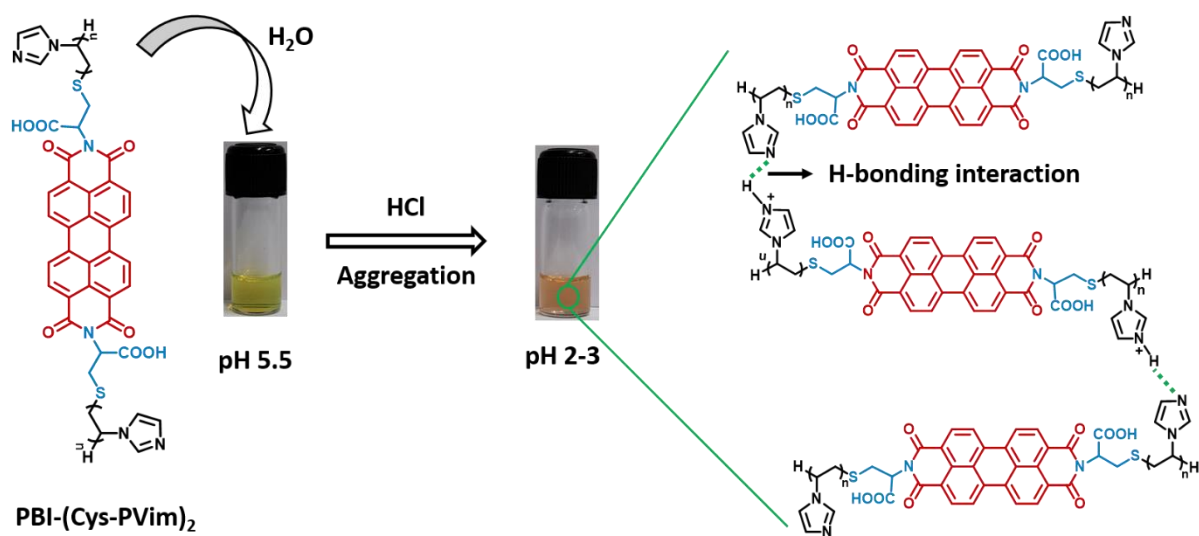

**Scheme S1.** Schematics of the aggregation between PBI-(Cys-PVim)<sub>2</sub> conjugate molecules through H-bonding interactions in acidic medium.

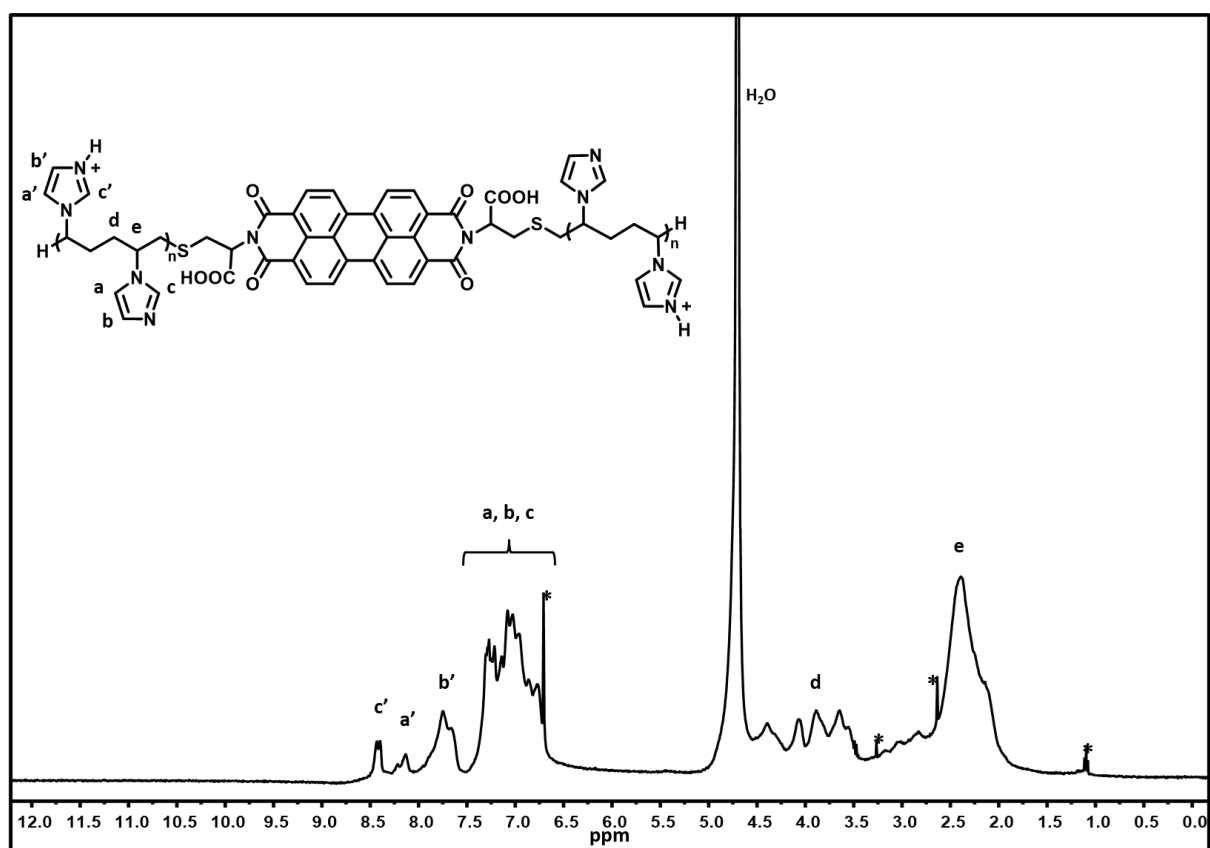

**Figure S16.** <sup>1</sup>H-NMR spectrum of representative **PBI-(Cys-PVim-II)<sub>2</sub>** in D<sub>2</sub>O in presence of HCl (\*solvent impurities).

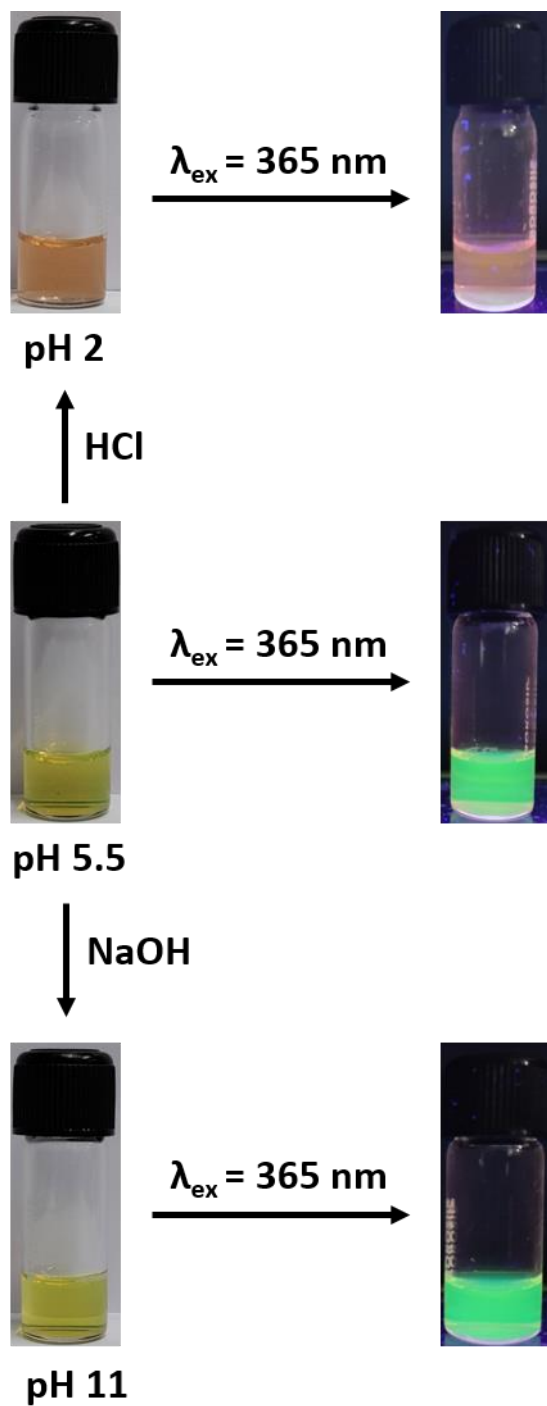

**Figure S17.** Images of the aqueous **PBI-(Cys-PVim-II)<sub>2</sub>** solution at different pHs under ambient and under irradiation of UV light.

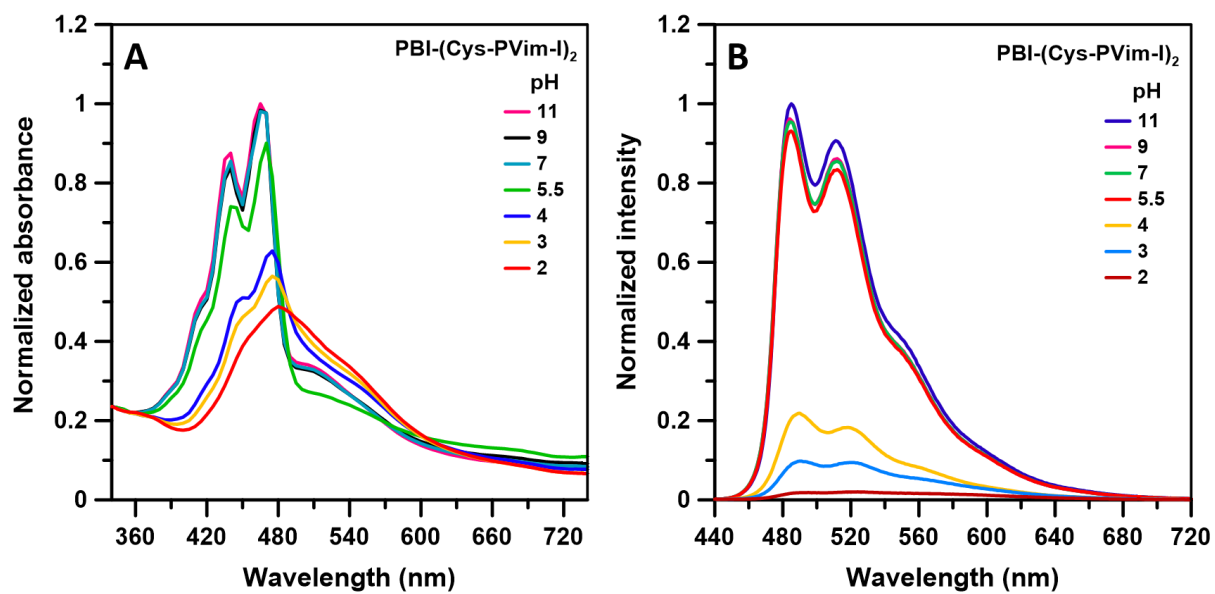

**Figure S18.** UV-vis absorption (A) and emission ( $\lambda_{\text{ex}} = 420$  nm) (B) spectra of aqueous **PBI-(Cys-PVim-I)<sub>2</sub>** solution (0.5 mg/mL) at different pH values ranging from 2 to 11.



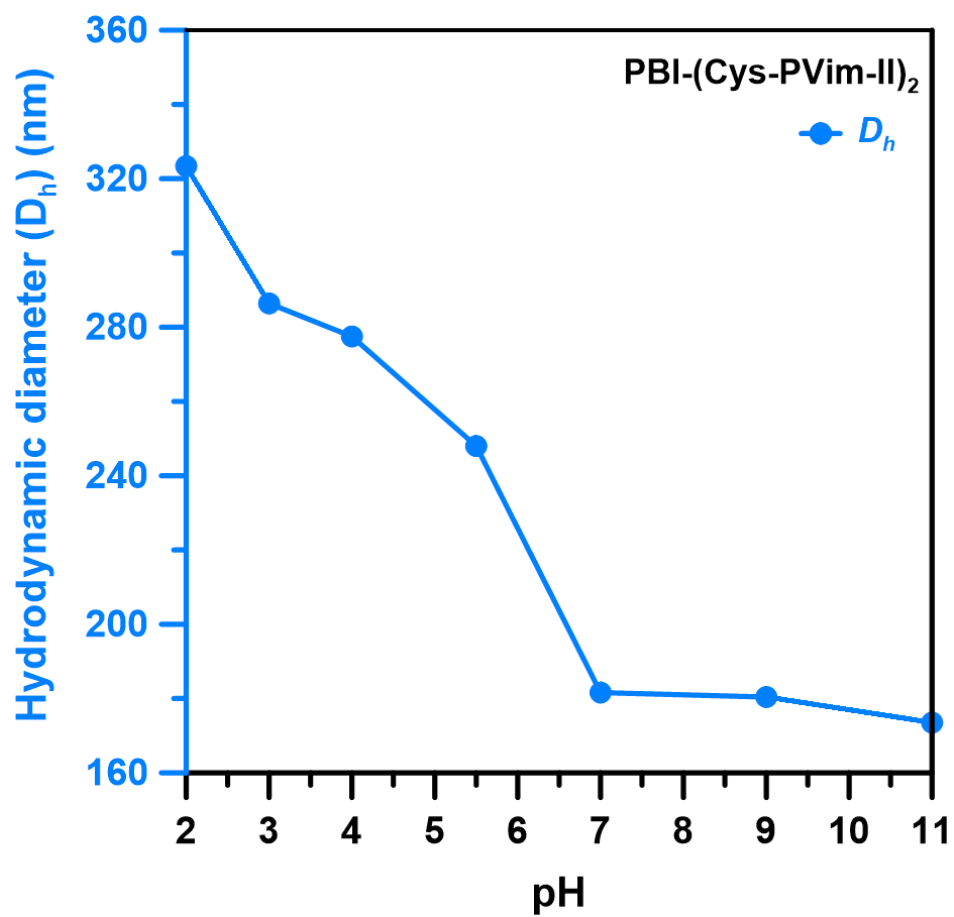

**Figure S19.** Variation of hydrodynamic diameters ( $D_h$ s) of the aqueous solution of **PBI-(Cys-PVim-II)<sub>2</sub>** (0.5 mg/mL) at different pHs ranging from 2-11.

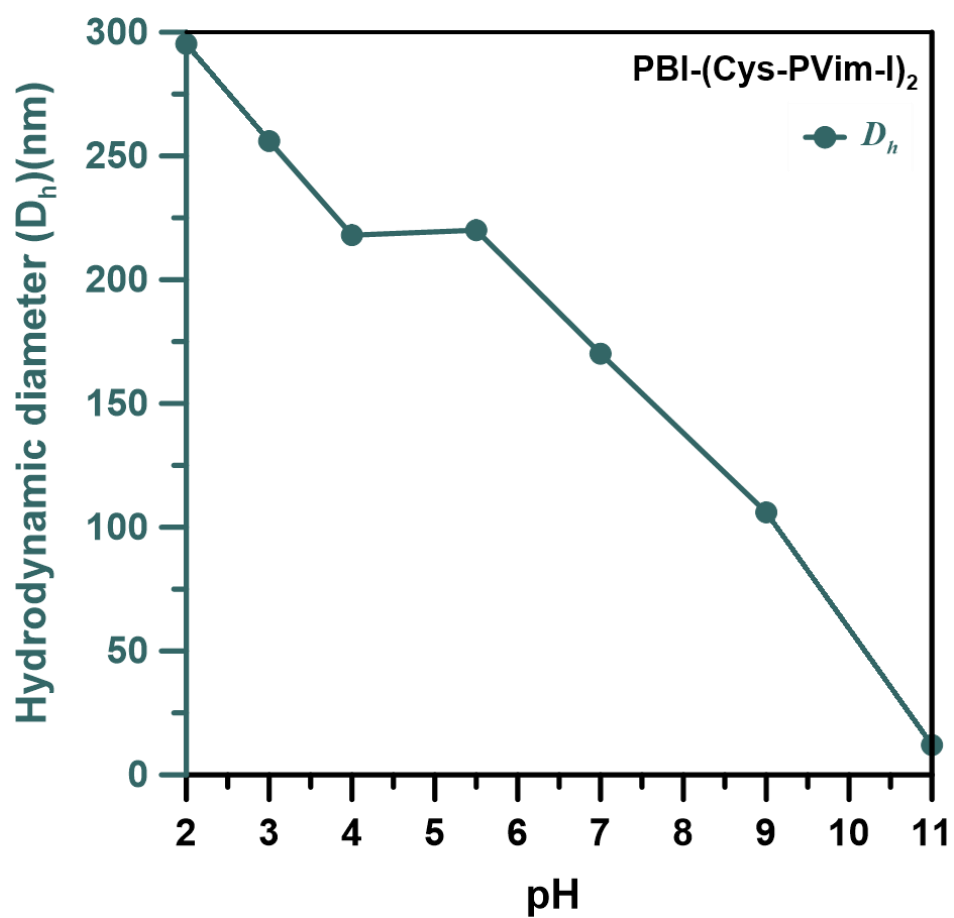

**Figure S20.** Variation of hydrodynamic diameters ( $D_h$ s) of the aqueous solution of **PBI-(Cys-PVim-I)<sub>2</sub>** (0.5 mg/mL) at different pHs ranging from 2-11.

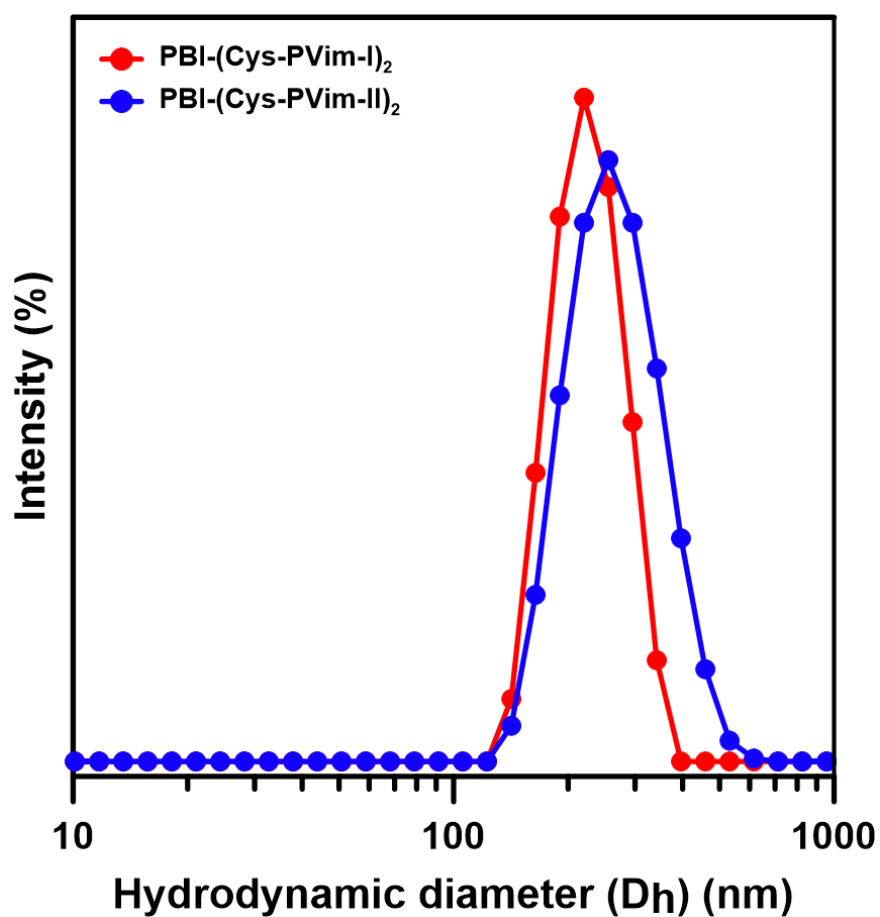

**Figure S21.** DLS distribution curves of **PBI-(Cys-PVim-I)<sub>2</sub>** and **PBI-(Cys-PVim-II)<sub>2</sub>** in water at a concentration of 0.5 mg/mL.

### Determination of Critical aggregation concentration (CAC) through DLS:

For CAC measurement, at first a series of aqueous solution of the **PBI-(Cys-PVim-I)<sub>2</sub>** was prepared with concentrations ranging from 0.06 to 1 mg/mL. The hydrodynamic diameter ( $D_h$ ) was then measured at 25 °C and were plotted against the logarithm of the concentrations (mg/mL) of polymer solutions. The plot clearly showed a slow increase of  $D_h$  with the increase of concentration followed by a sudden jump. The CAC was measured at which the  $D_h$  was half of its maximum value and was found to be 0.44 mg/mL (Figure S22).

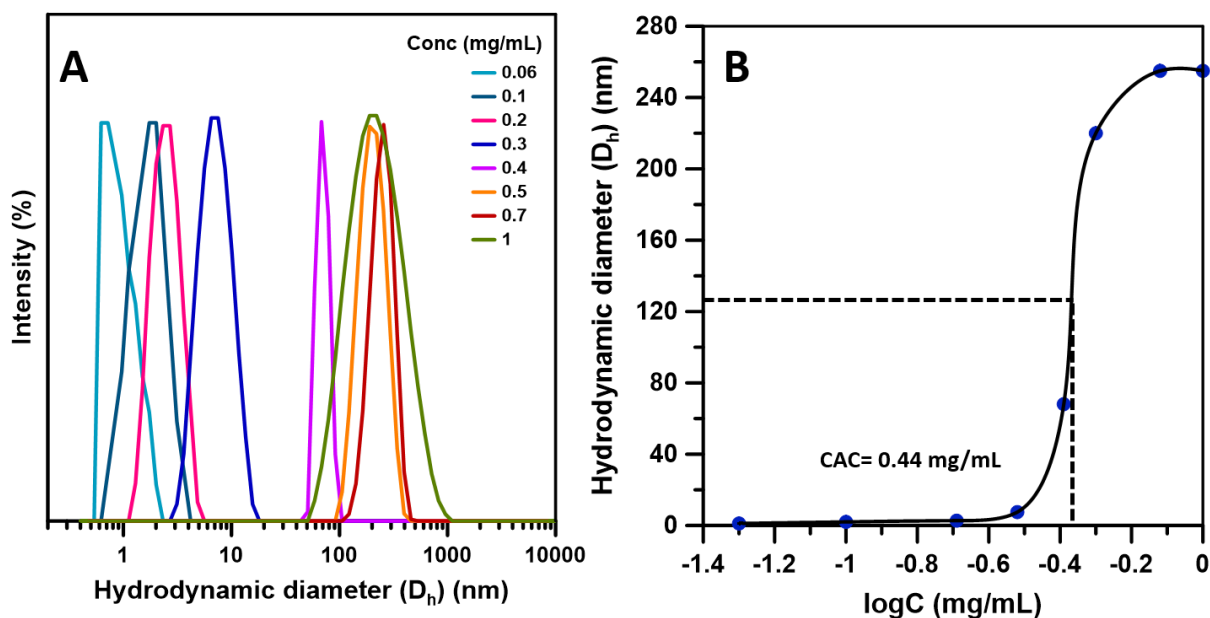

**Figure S22.** Particle size distribution of the **PBI-(Cys-PVim-I)<sub>2</sub>** in water of its varying concentration ranging from (0.06 to 1 mg/mL) (A). The plot of  $D_h$  as a function of logarithm of **PBI-(Cys-PVim-I)<sub>2</sub>** concentration.

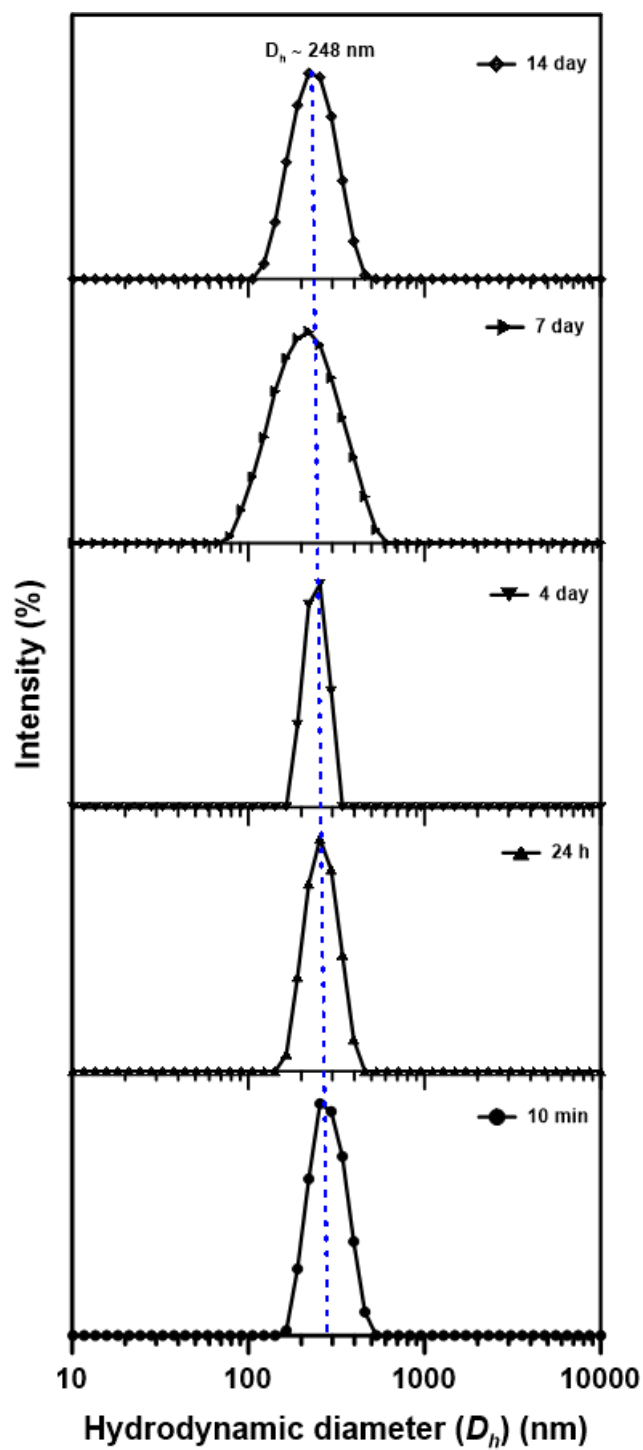

**Figure S23.** DLS distribution curves of **PBI-(Cys-PVim-II)<sub>2</sub>** (0.5 mg/mL) in water at different time intervals.

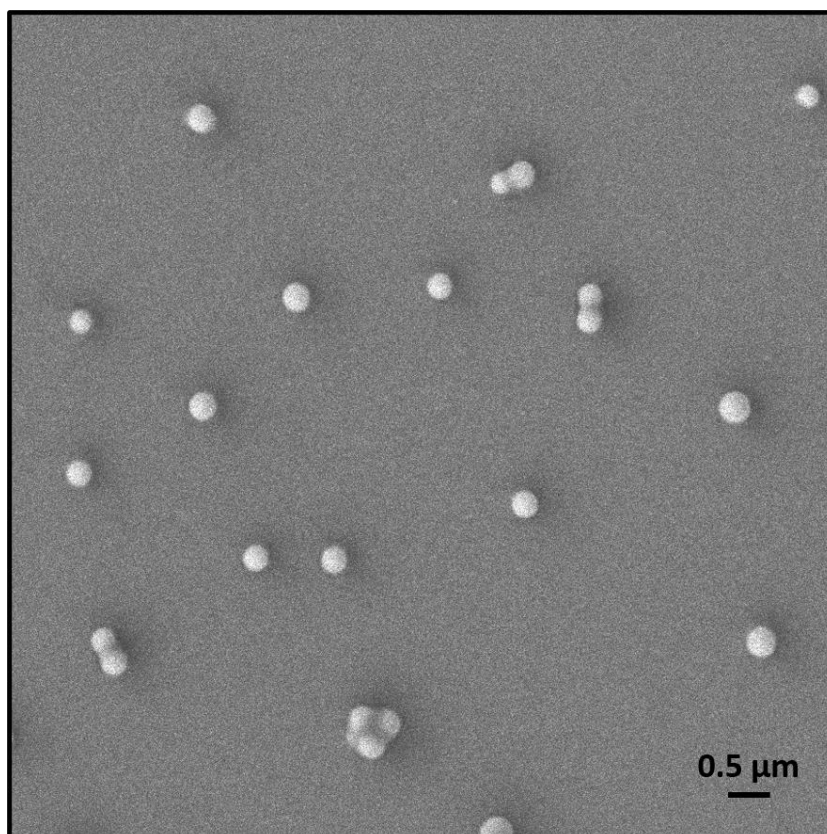

**Figure S24.** FESEM image of aggregated **PBI-(Cys-PVim-II)<sub>2</sub>** formed in water at a concentration of 0.5 mg/mL.

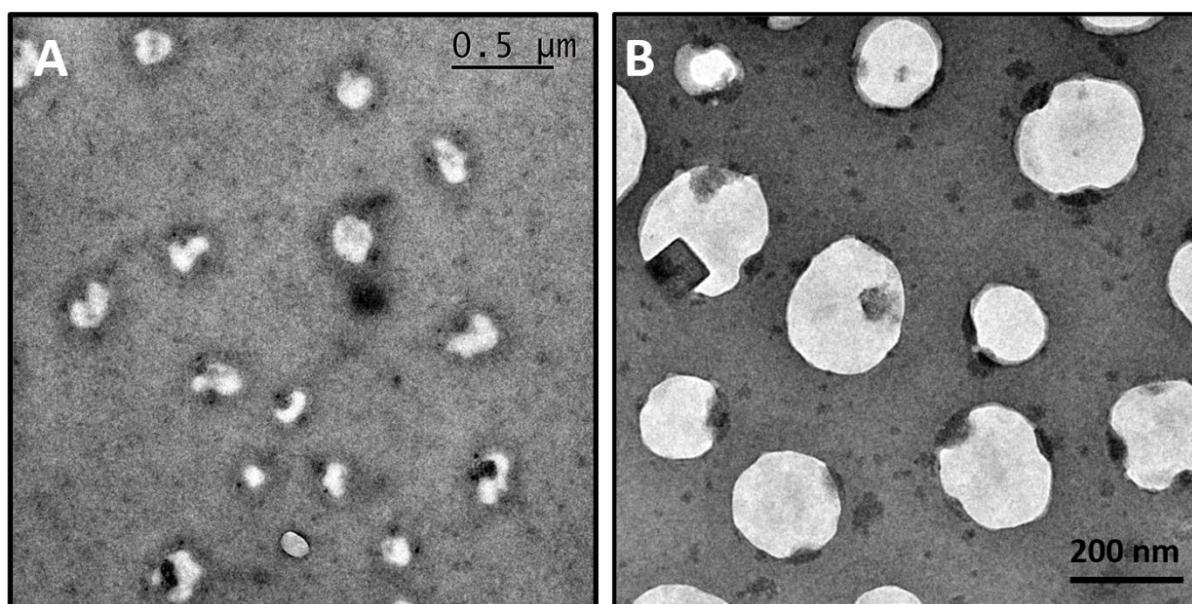

**Figure S25.** TEM images of vesicular aggregates of **PBI-(Cys-PVim-I)<sub>2</sub>** (A) and **PBI-(Cys-PVim-II)<sub>2</sub>** in water at a concentration of 0.5 mg/mL.

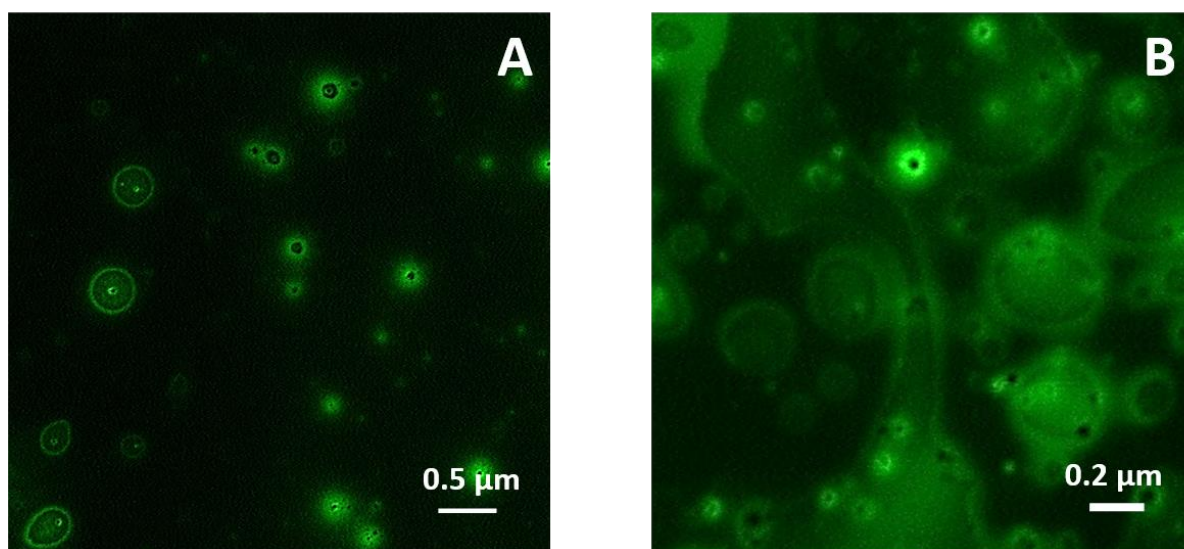

**Figure S26.** Confocal microscopic images of vesicular aggregates of **PBI-(Cys-PVim-II)<sub>2</sub>** (A) and **PBI-(Cys-PVim-I)<sub>2</sub>** (B) in water at a concentration of 0.5 mg/mL.



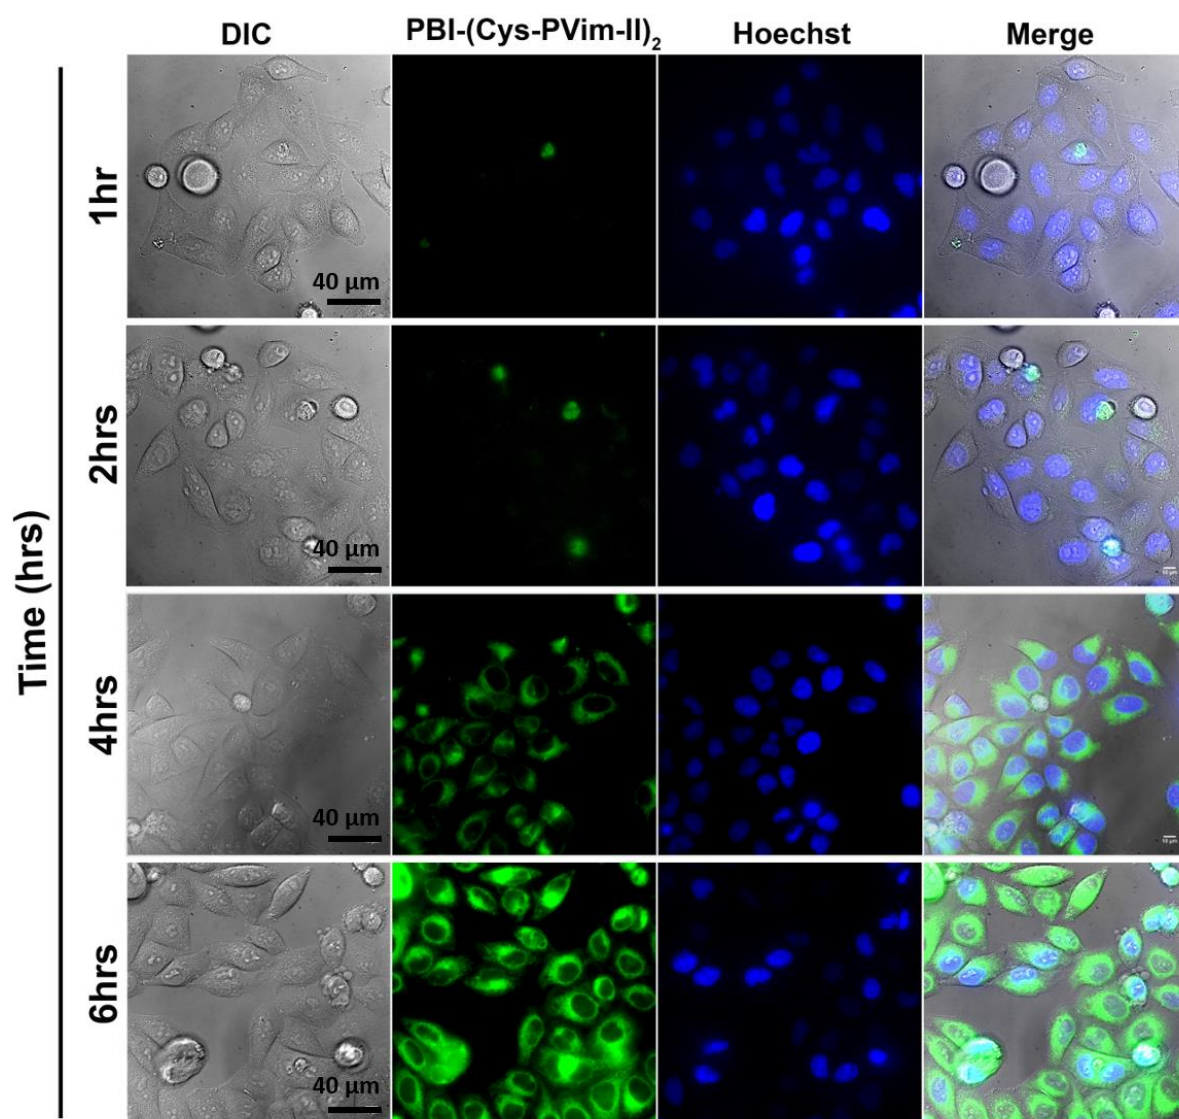

**Figure S27.** Time-dependent fluorescence microscopic live cell images of HeLa cells in the presence of **PBI-(Cys-PVim-II)<sub>2</sub>** conjugate.

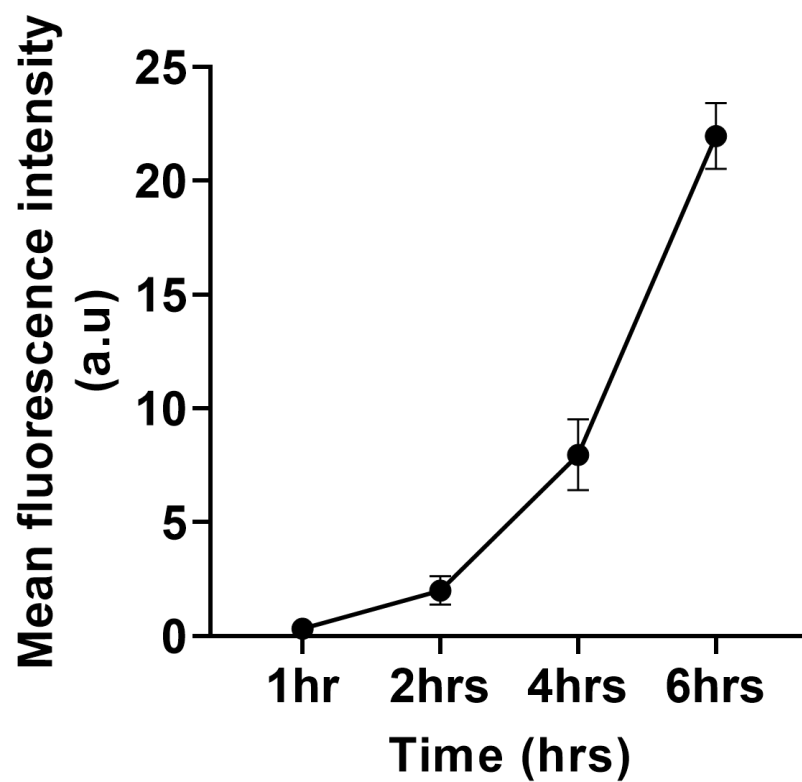

**Figure S28.** Variation of mean fluorescence intensity with increasing the incubation time of HeLa cells in the presence of **PBI-(Cys-PVim-II)<sub>2</sub>**.

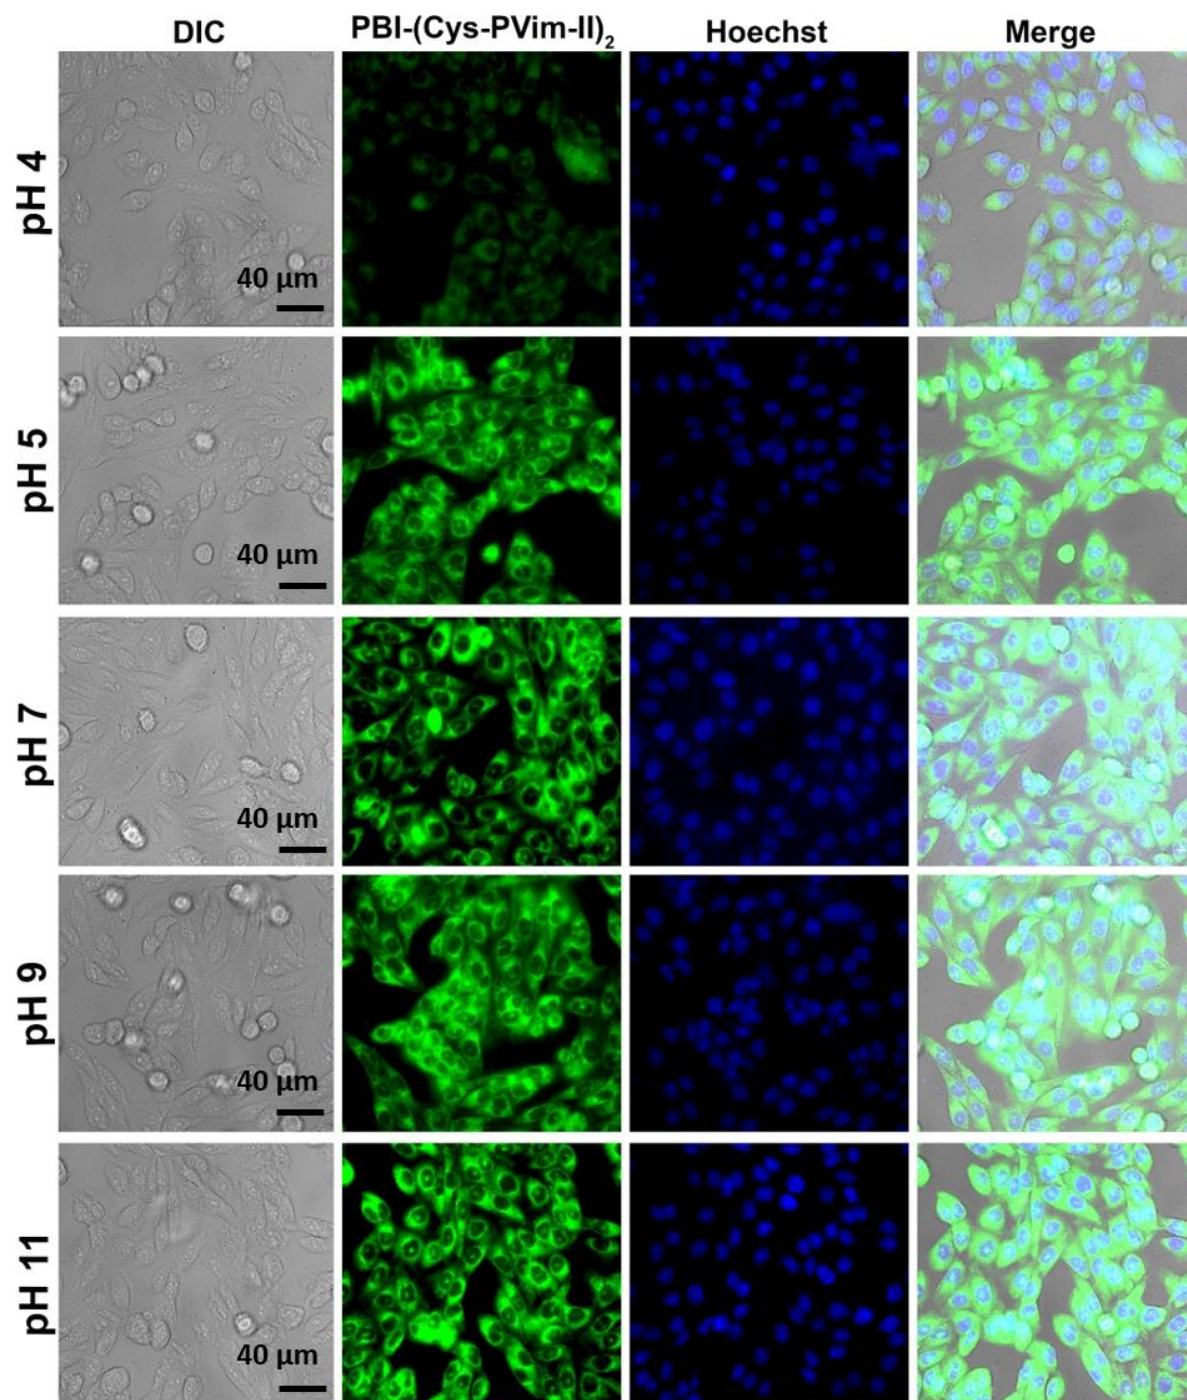

**Figure S29.** pH-dependent fluorescence microscopic live cell images of HeLa cells in the presence of **PBI-(Cys-PVim-II)<sub>2</sub>** conjugate.

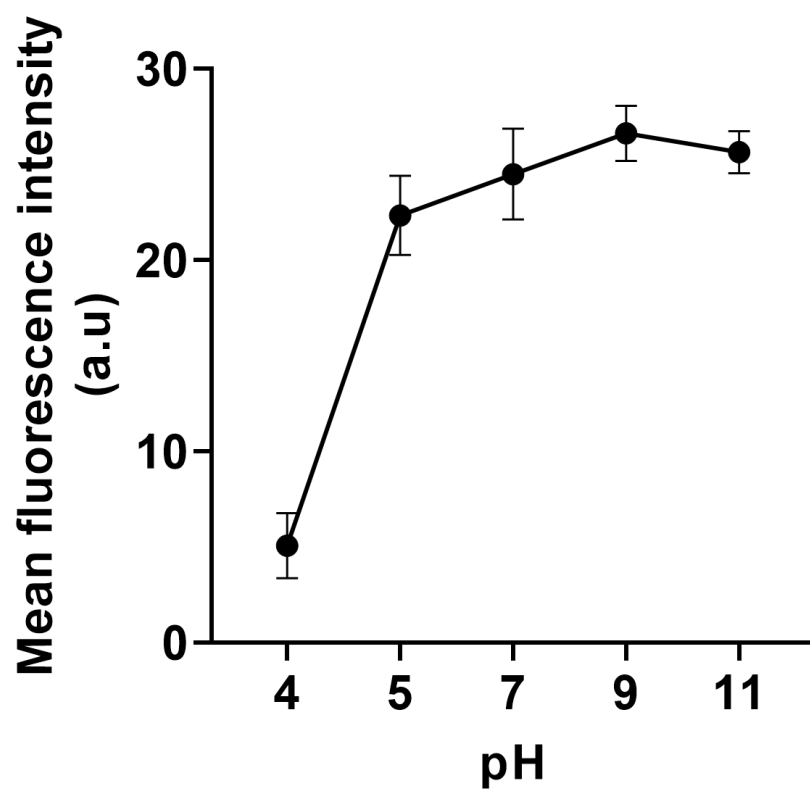

**Figure S30.** Variation of mean fluorescence intensity with increasing the pH of incubated HeLa cells in the presence of **PBI-(Cys-PVim-II)<sub>2</sub>**.

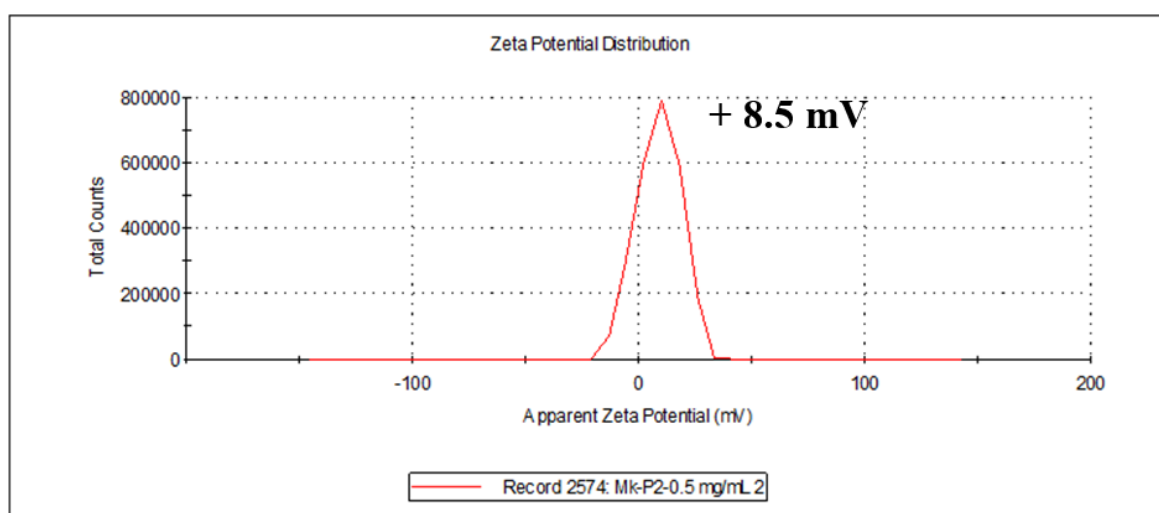

**Figure S31.** Zeta potential ( $\xi$ ) of **PBI-(Cys-PVim-II)<sub>2</sub>** conjugate in water at a concentration of 0.5 mg/mL.

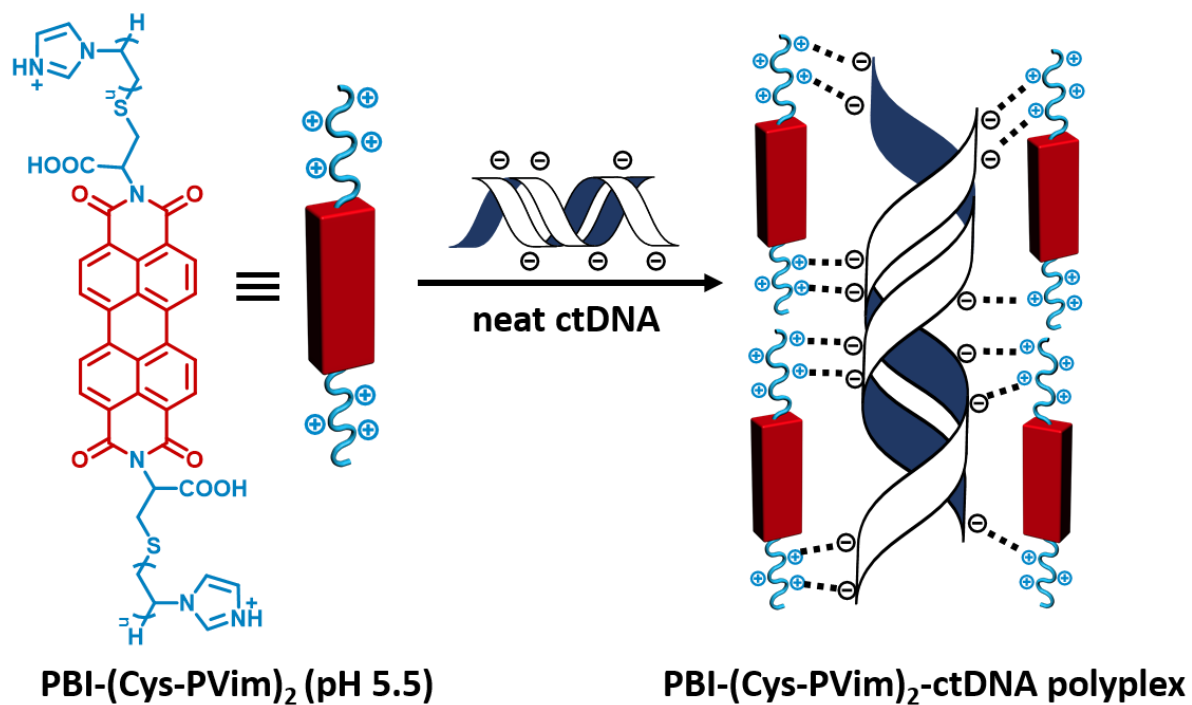

**Scheme S2.** Schematic representation for the binding of ctDNA with PBI-(Cys-PVim)<sub>2</sub> conjugate.

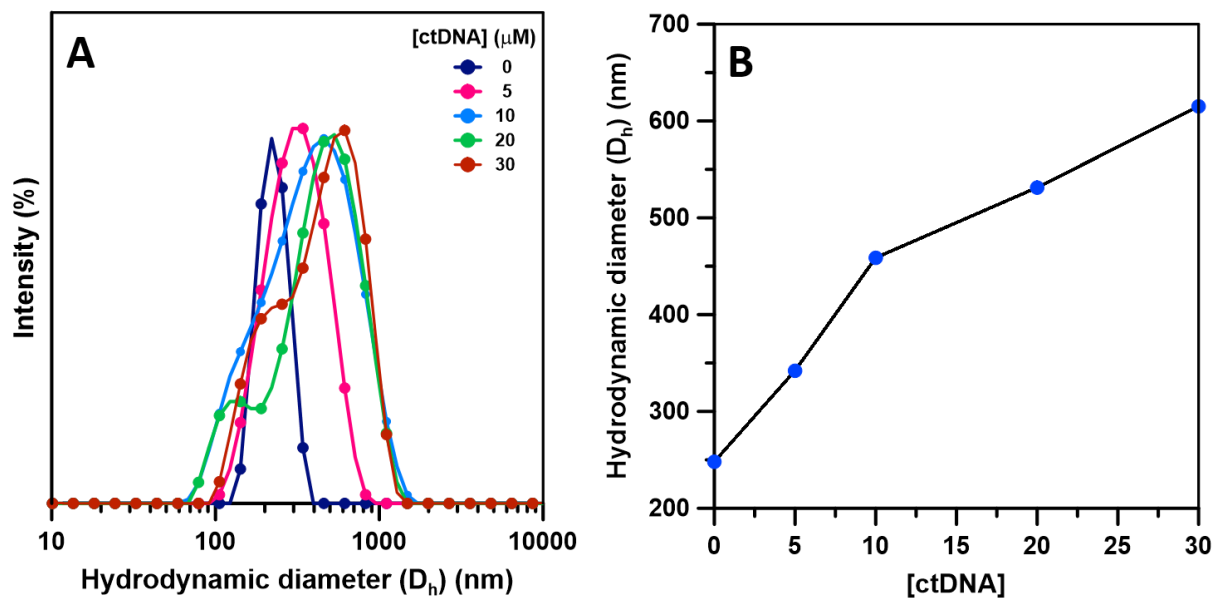

**Figure S32.** Intensity-weighted particle size-distribution of **PBI-(Cys-PVim-II)<sub>2</sub>** (35 μM) with different concentrations of ctDNA (A). The plot of variation of hydrodynamic diameters ( $D_h$ s) of **PBI-(Cys-PVim-II)<sub>2</sub>/ctDNA** polyplexes in the presence of varying concentration of ctDNA (B).

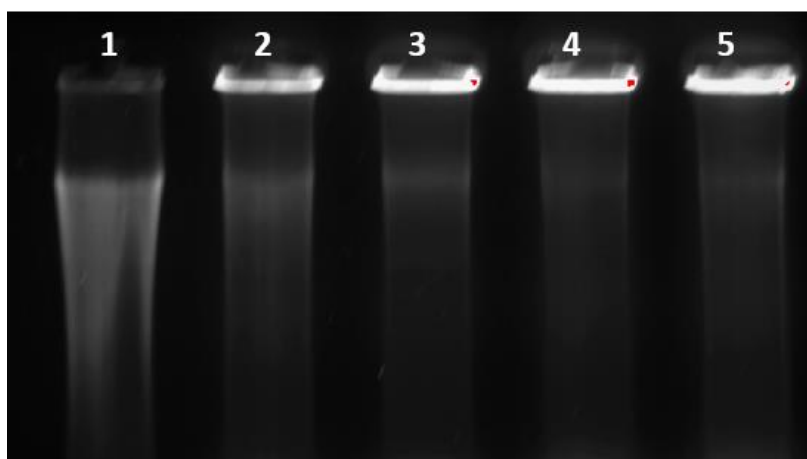

**Figure S33.** Electrophoretic mobility of ctDNA (1.27 mM) upon addition of different concentrations of **PBI-(Cys-PVim-II)<sub>2</sub>** ranging from 35-80  $\mu$ M.



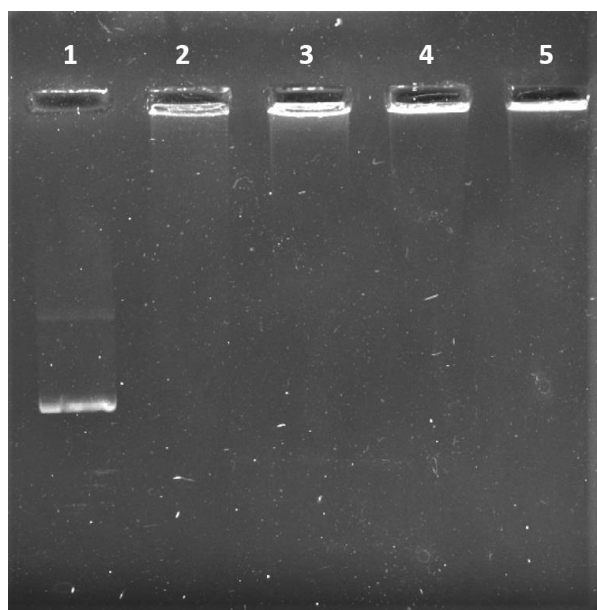

**Figure S34.** Electrophoretic mobility of plasmid DNA (100 ng/mL) upon addition of different concentrations of **PBI-(Cys-PVim-II)<sub>2</sub>** ranging from 35-80  $\mu$ M.

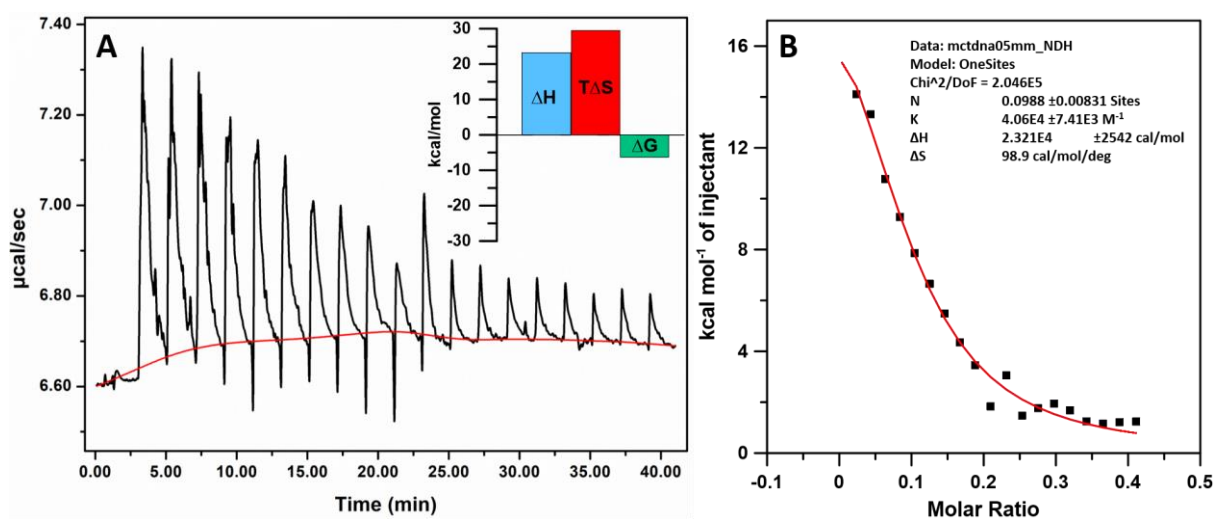

**Figure S35.** ITC thermogram showing the titration of 1 mM of ctDNA with 0.5 mM of **PBI-(Cys-PVim-II)<sub>2</sub>**, Inset showed the comparison of the enthalpy, entropic factor, and the Gibbs energy of the interactions (A). The one-site binding plotting from the thermogram (B)
